# Supplementary material
Source: PubMed Central journal article supplement (PMC10287065)

**A**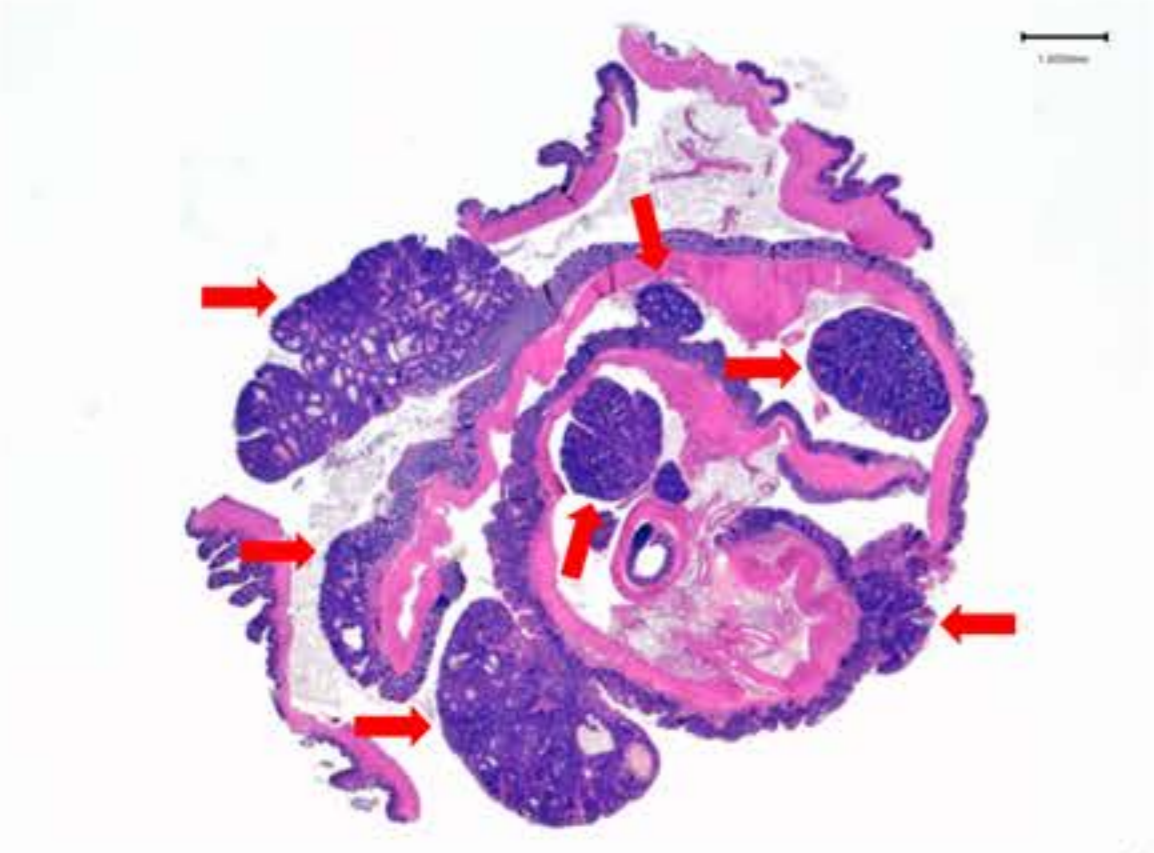

Green arrow = low grade adenoma  
Red arrow = high grade adenoma

| Animal ID | Genotype | Hyperplasia | Herniation | Inflammation | Adenoma (#) |            |
|-----------|----------|-------------|------------|--------------|-------------|------------|
|           |          |             |            |              | low grade   | high grade |
| 89        | HET      | 1           | 0          | 0            | 1(7)        |            |

**B**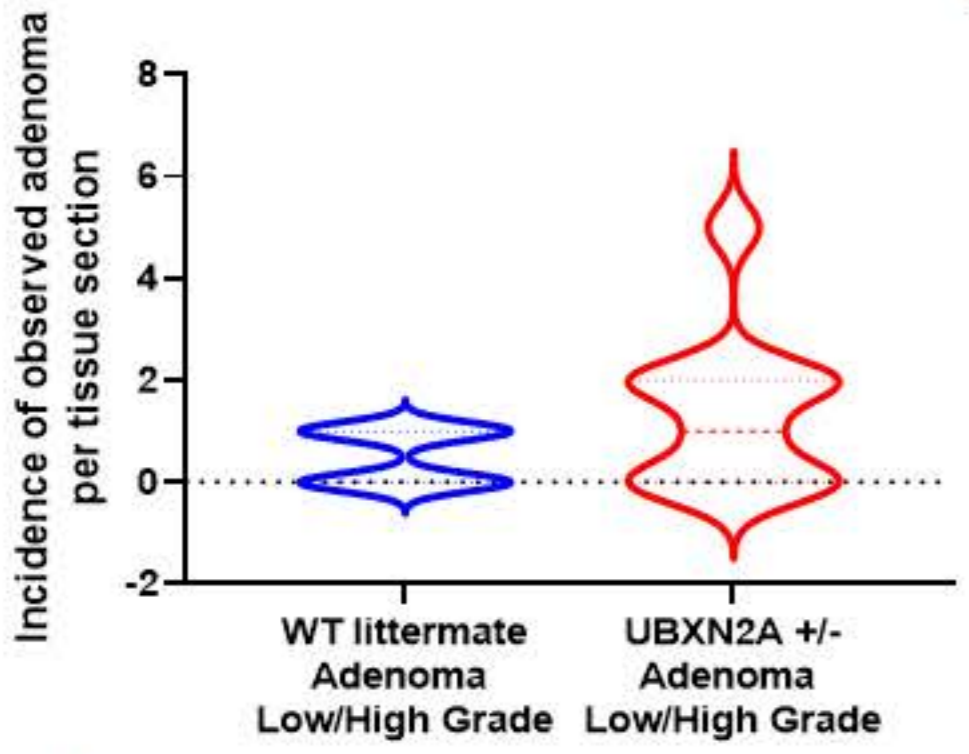**C**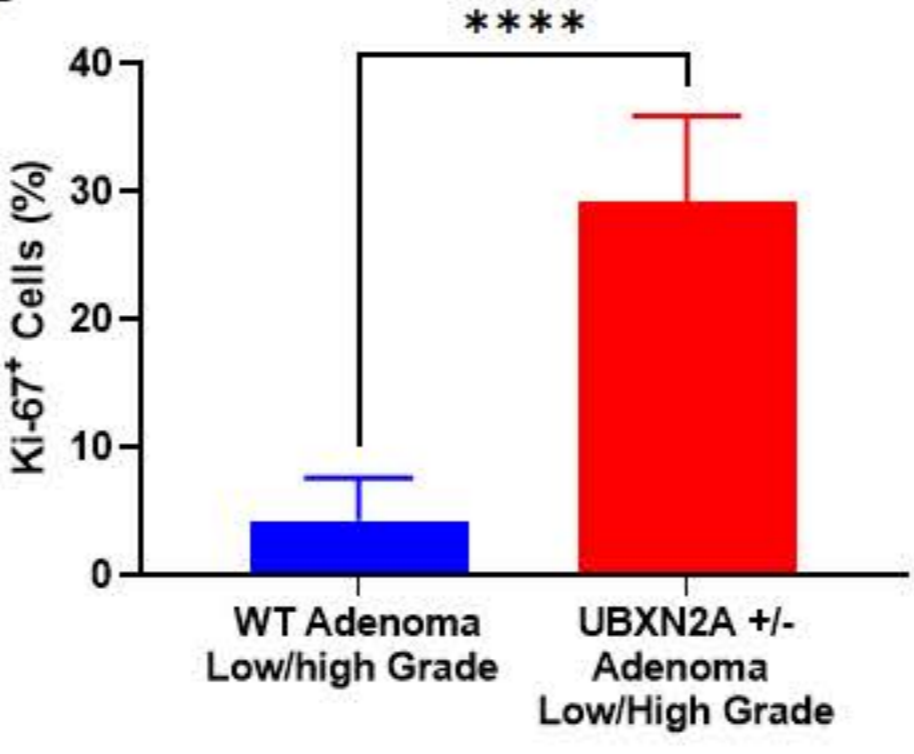**D**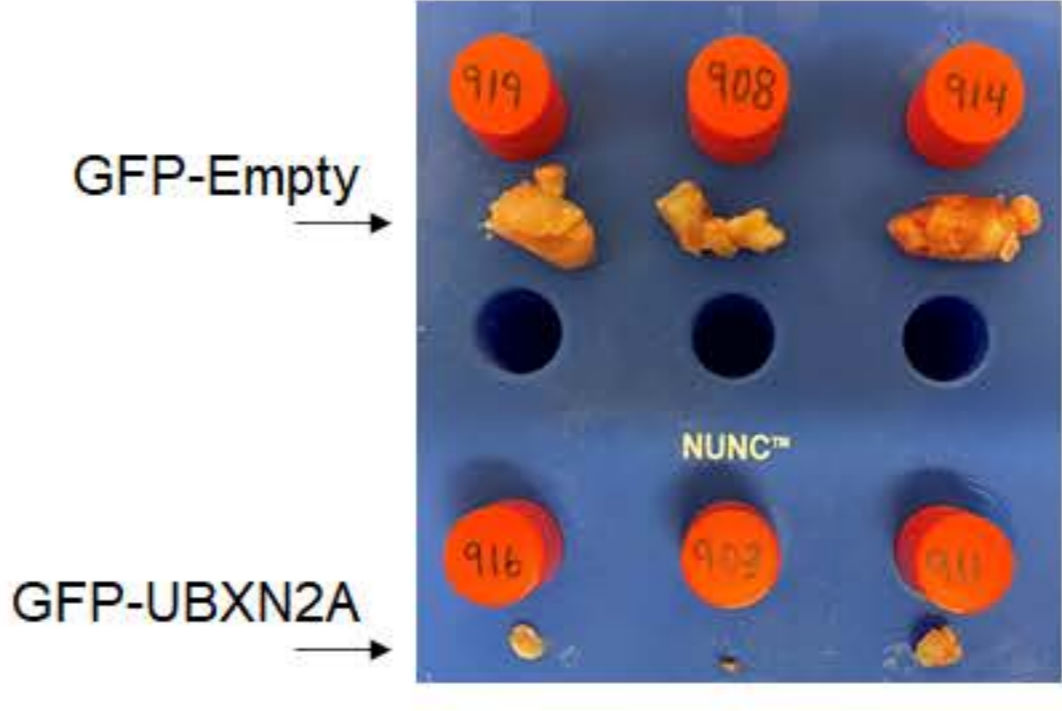**E**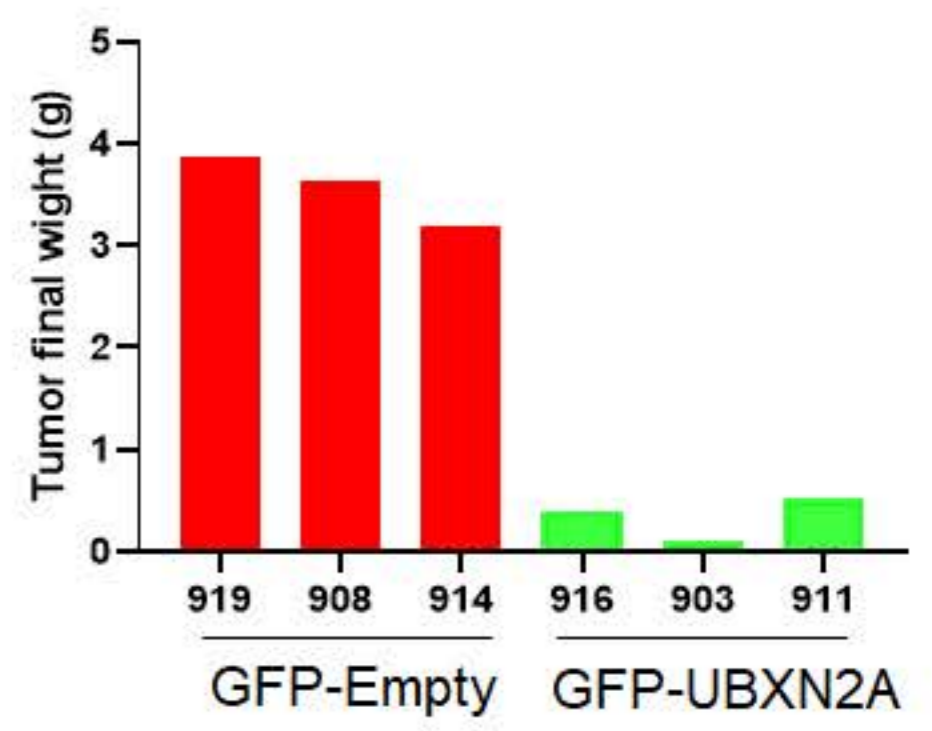**F**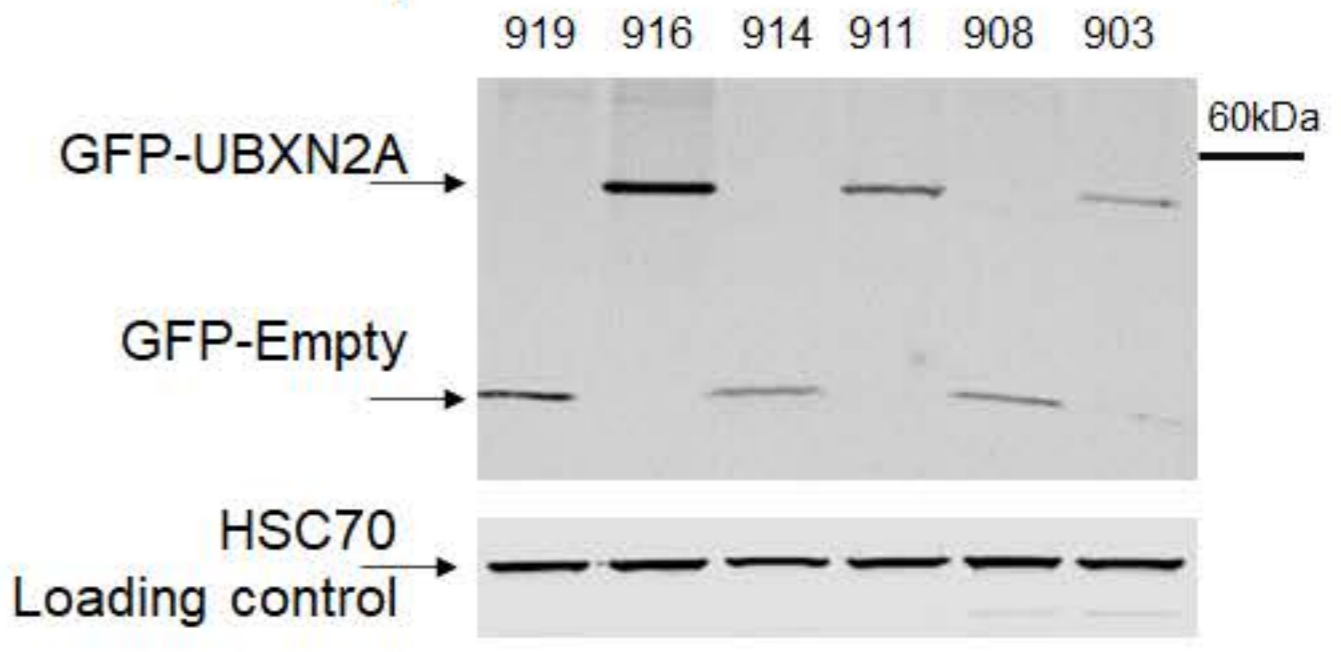**G**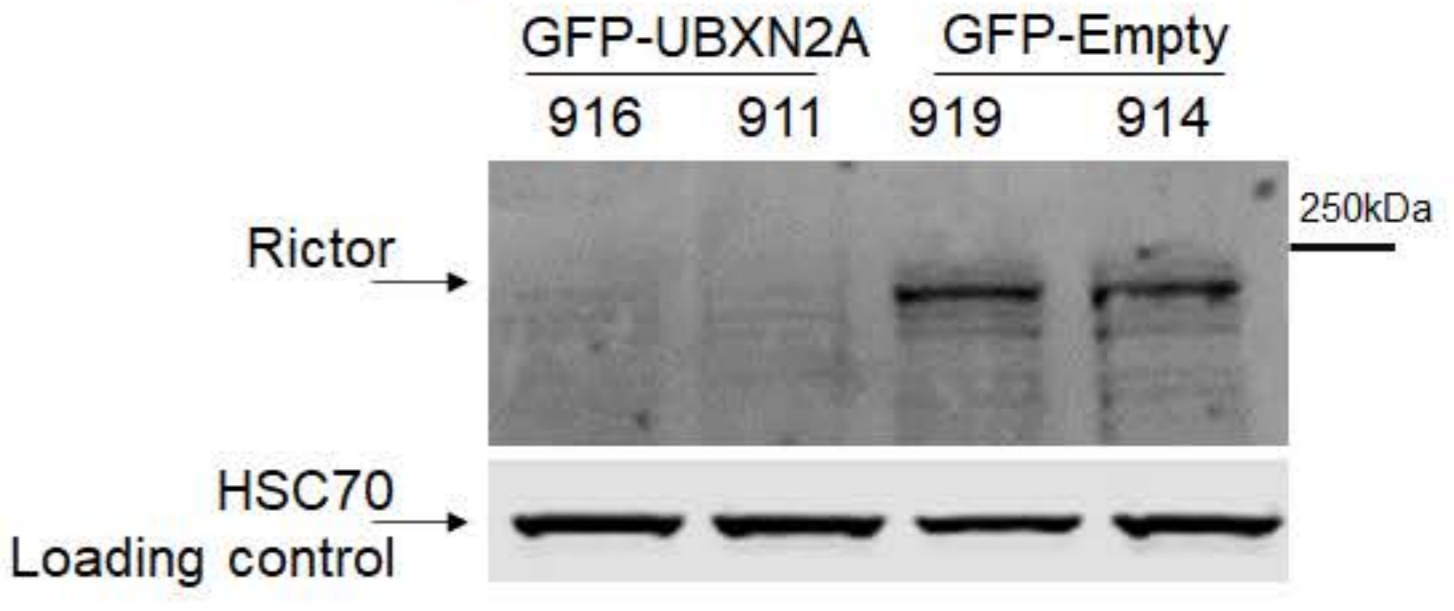**H**

| PDXs | gender | age | sample type | histological type | location     | BMI  | Alcohol | Smoker | CEA ng/ml | CA19-9 U/ml | Tumor size |
|------|--------|-----|-------------|-------------------|--------------|------|---------|--------|-----------|-------------|------------|
| I    | f      | 85  | Carcinoma   | Adenocarcinoma    | Right colon  | 22.8 | no      | no     | 4.4       | 3.29        | 5.5        |
| II   | f      | 68  | Carcinoma   | Adenocarcinoma    | Right colon  | 27.5 | no      | no     | 5.56      | 3.43        | 7,5x7      |
| III  | m      | 77  | Carcinoma   | Adenocarcinoma    | Right colon  | 25.9 | yes     | no     | 1.59      | 11.7        | 2,5x2,5    |
| IV   | m      | 83  | Carcinoma   | Adenocarcinoma    | Rektosigmoid | 32.4 | no      | no     | 0.8       | 6.89        | n.a.       |
| VI   | m      | 52  | Carcinoma   | Adenocarcinoma    | Right colon  | 26.2 | yes     | no     | n.a.      | n.a.        | 9x14       |
| VI   | f      | 88  | Carcinoma   | Adenocarcinoma    | Right colon  | 35.9 | no      | no     | n.a.      | n.a.        | 2,2x2,2    |
| VII  | f      | 67  | Carcinoma   | Adenocarcinoma    | Right colon  | 22.3 | no      | no     | 8.48      | 115         | 6x6        |
| VIII | f      | 59  | Carcinoma   | Adenocarcinoma    | Left colon   | 29   | yes     | yes    | 17.9      | n.a.        | 11,5x6,5   |

**I**

| PDXs | Therapy                                                                                                                                                                                                                                                         |
|------|-----------------------------------------------------------------------------------------------------------------------------------------------------------------------------------------------------------------------------------------------------------------|
| I    | primary resection, no adjuvant treatment                                                                                                                                                                                                                        |
| II   | primary resection, no adjuvant treatment                                                                                                                                                                                                                        |
| III  | one-stage resection of right colon and hepatic metastasis (Met1) (R0) followed by FOLFOX (13.08.2013-24.09.2013), followed by 7 cycles of FU/FA (05.11.2013-28.01.2014), followed by 2 cycles of FOLFIRI + bevacizumab (03.07.2014-?). Recidive liver meta foll |
| IV   | palliative sigmoid resection and liver biopsy, palliative treatment with 12 cycles of FOLFOX (15.07.2014- 15.01.2015) due to new recurred metastases                                                                                                            |
| VI   | primary resection, no adjuvant treatment                                                                                                                                                                                                                        |
| VI   | primary resection, no adjuvant treatment                                                                                                                                                                                                                        |
| VII  | primary resection, adjuvant treatment 1 month Capecitabine (01.03.2008- 12.04.2008) followed by 1 month of 5-FU/ FA (MAYO protocol) 23.06.2008-18.08.2008                                                                                                       |
| VIII | primary resection, no adjuvant treatment                                                                                                                                                                                                                        |

GFP-Empty  
No Dox

**A**

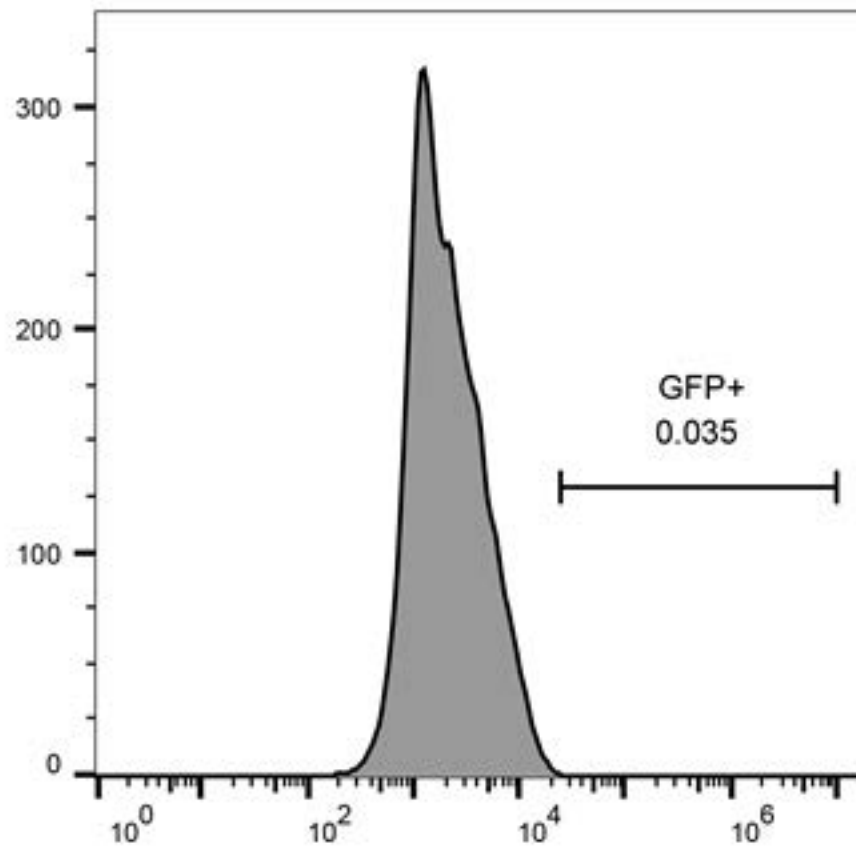

GFP-Empty  
Plus Dox

**B**

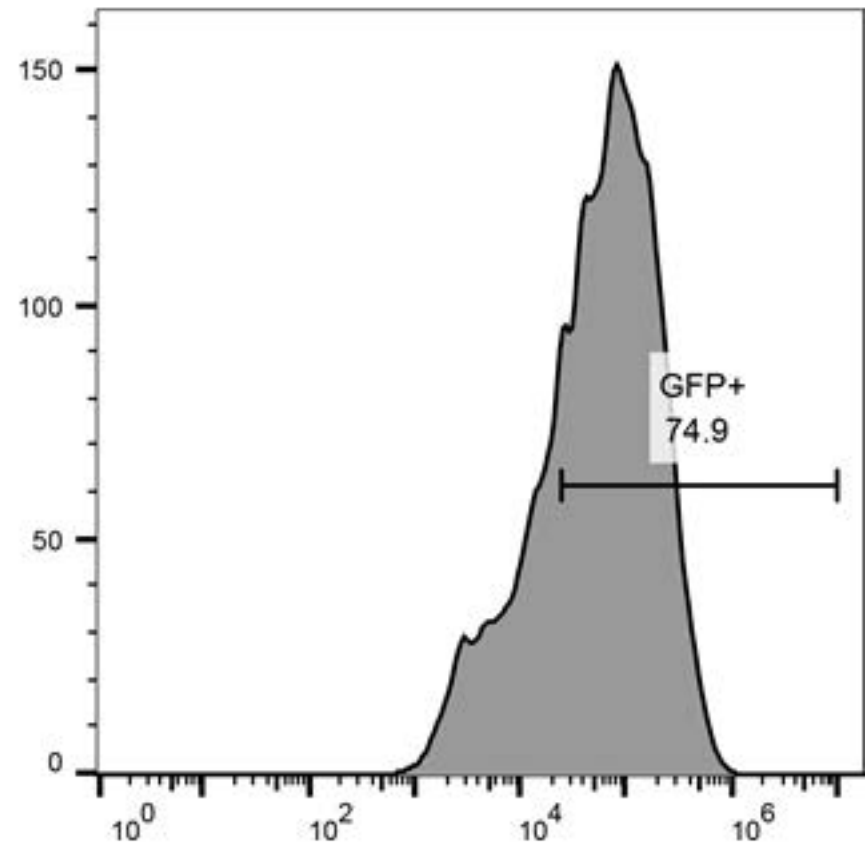

GFP-UBXN2A  
No Dox

**C**

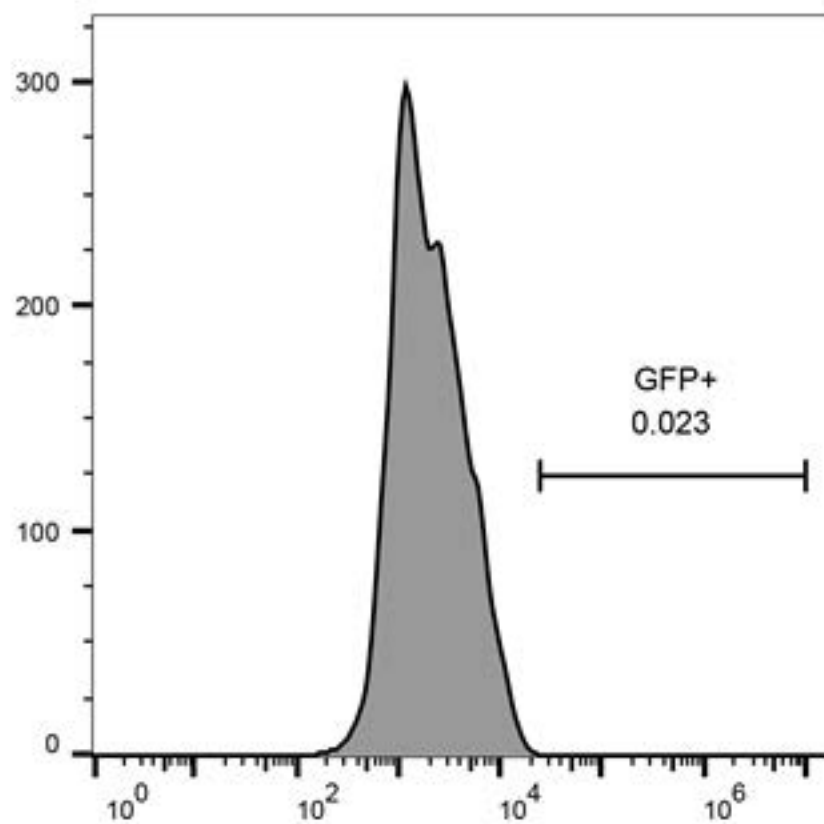

GFP-UBXN2A  
Plus Dox

**D**

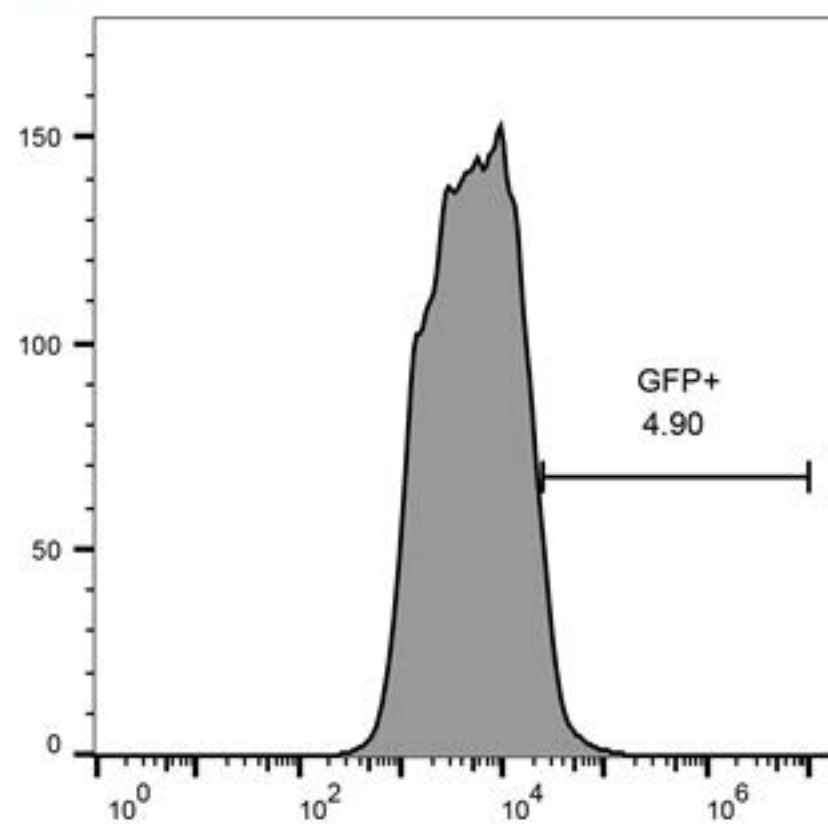

HCT-116-DOX induced for 72 hours

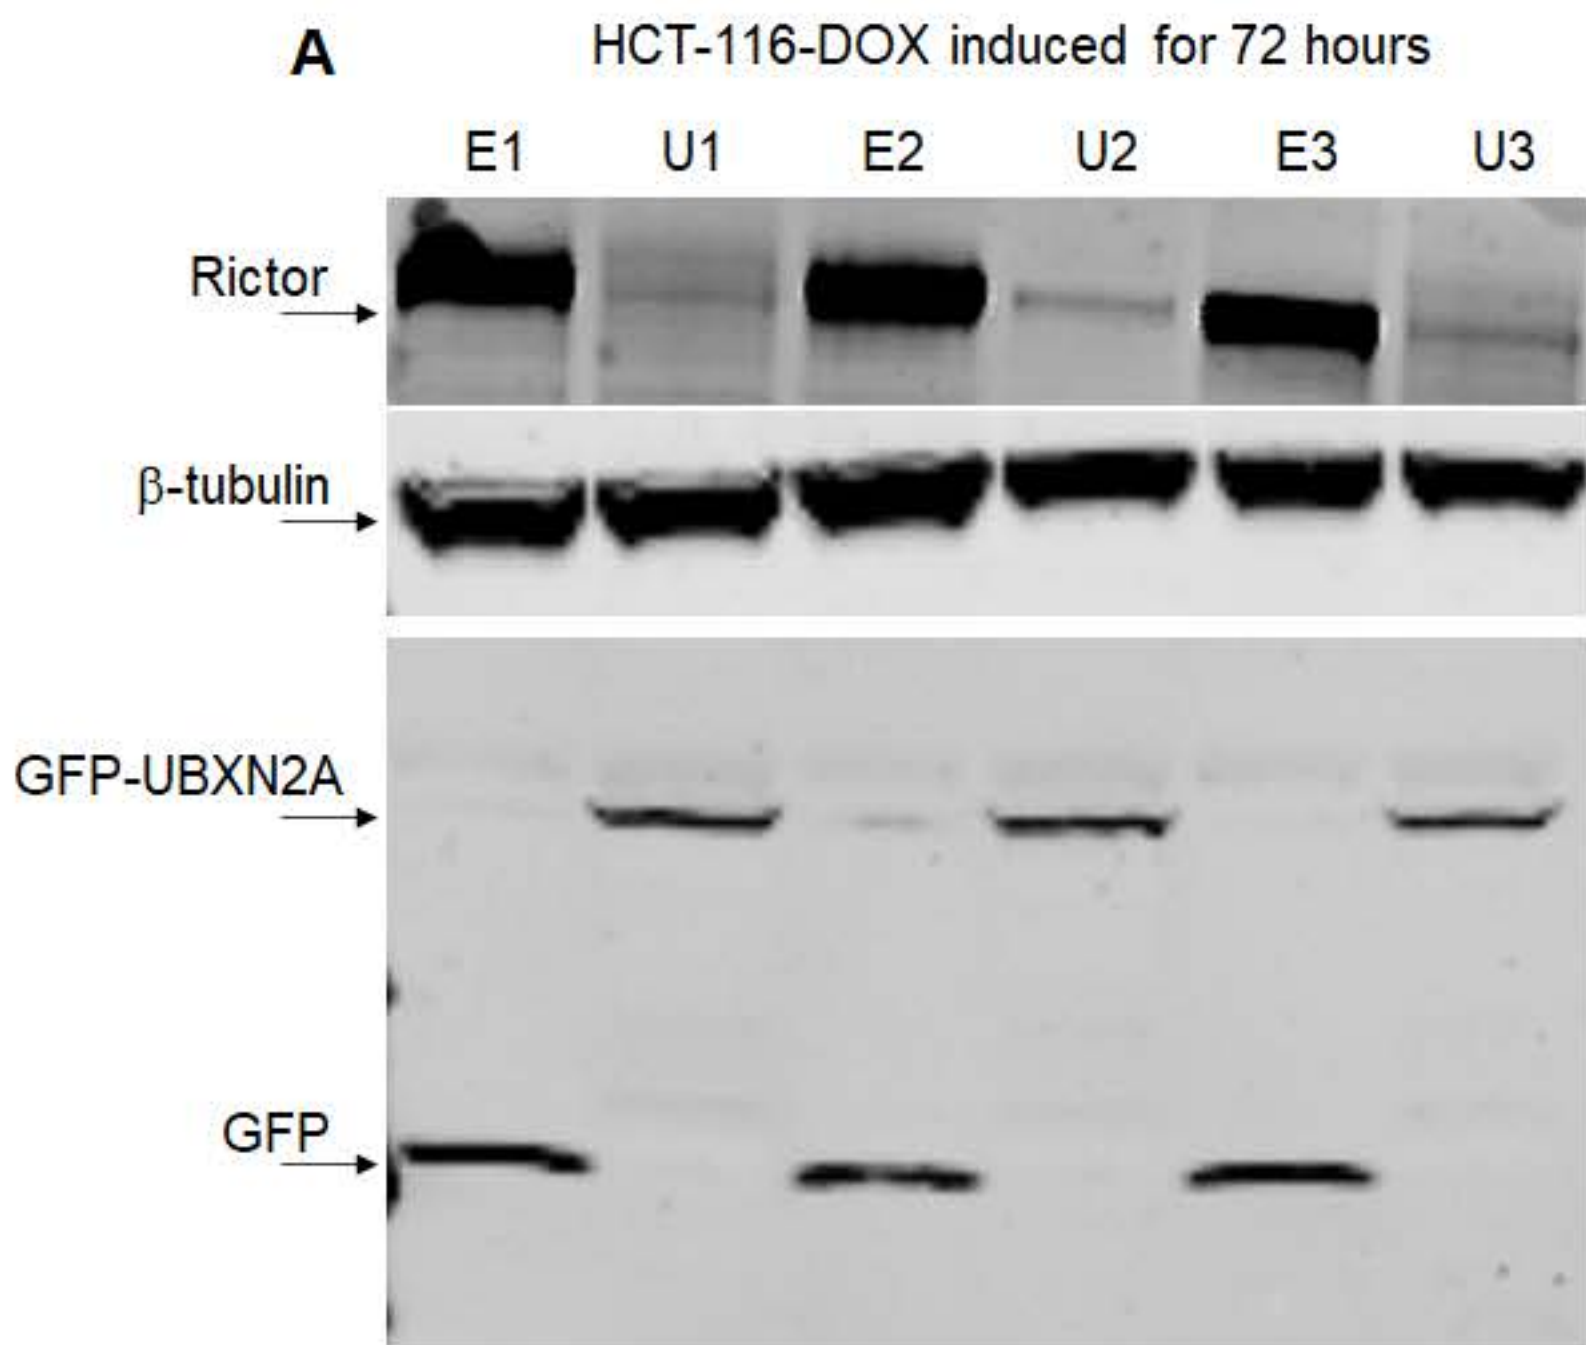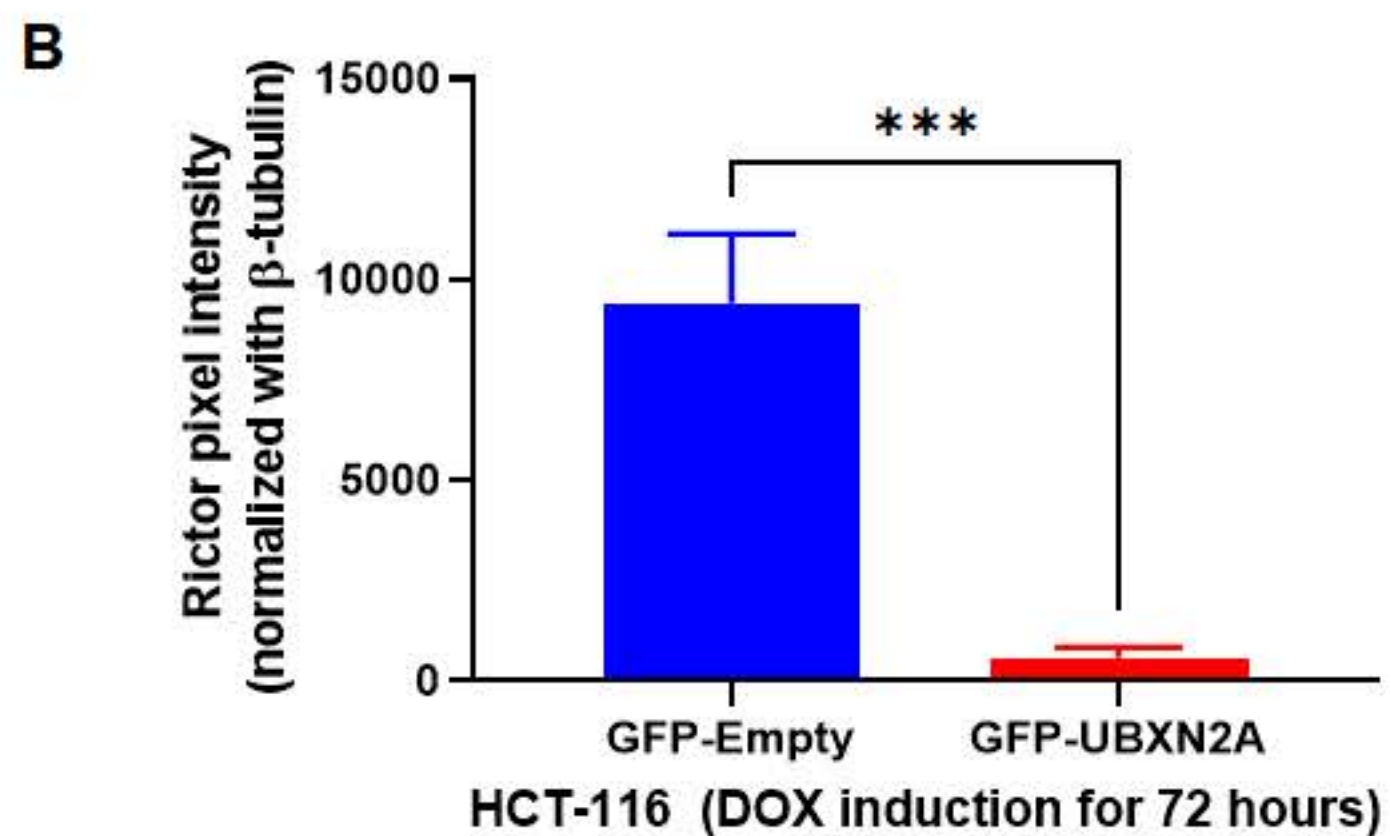

GFP-Empty

GFPUBXN2A

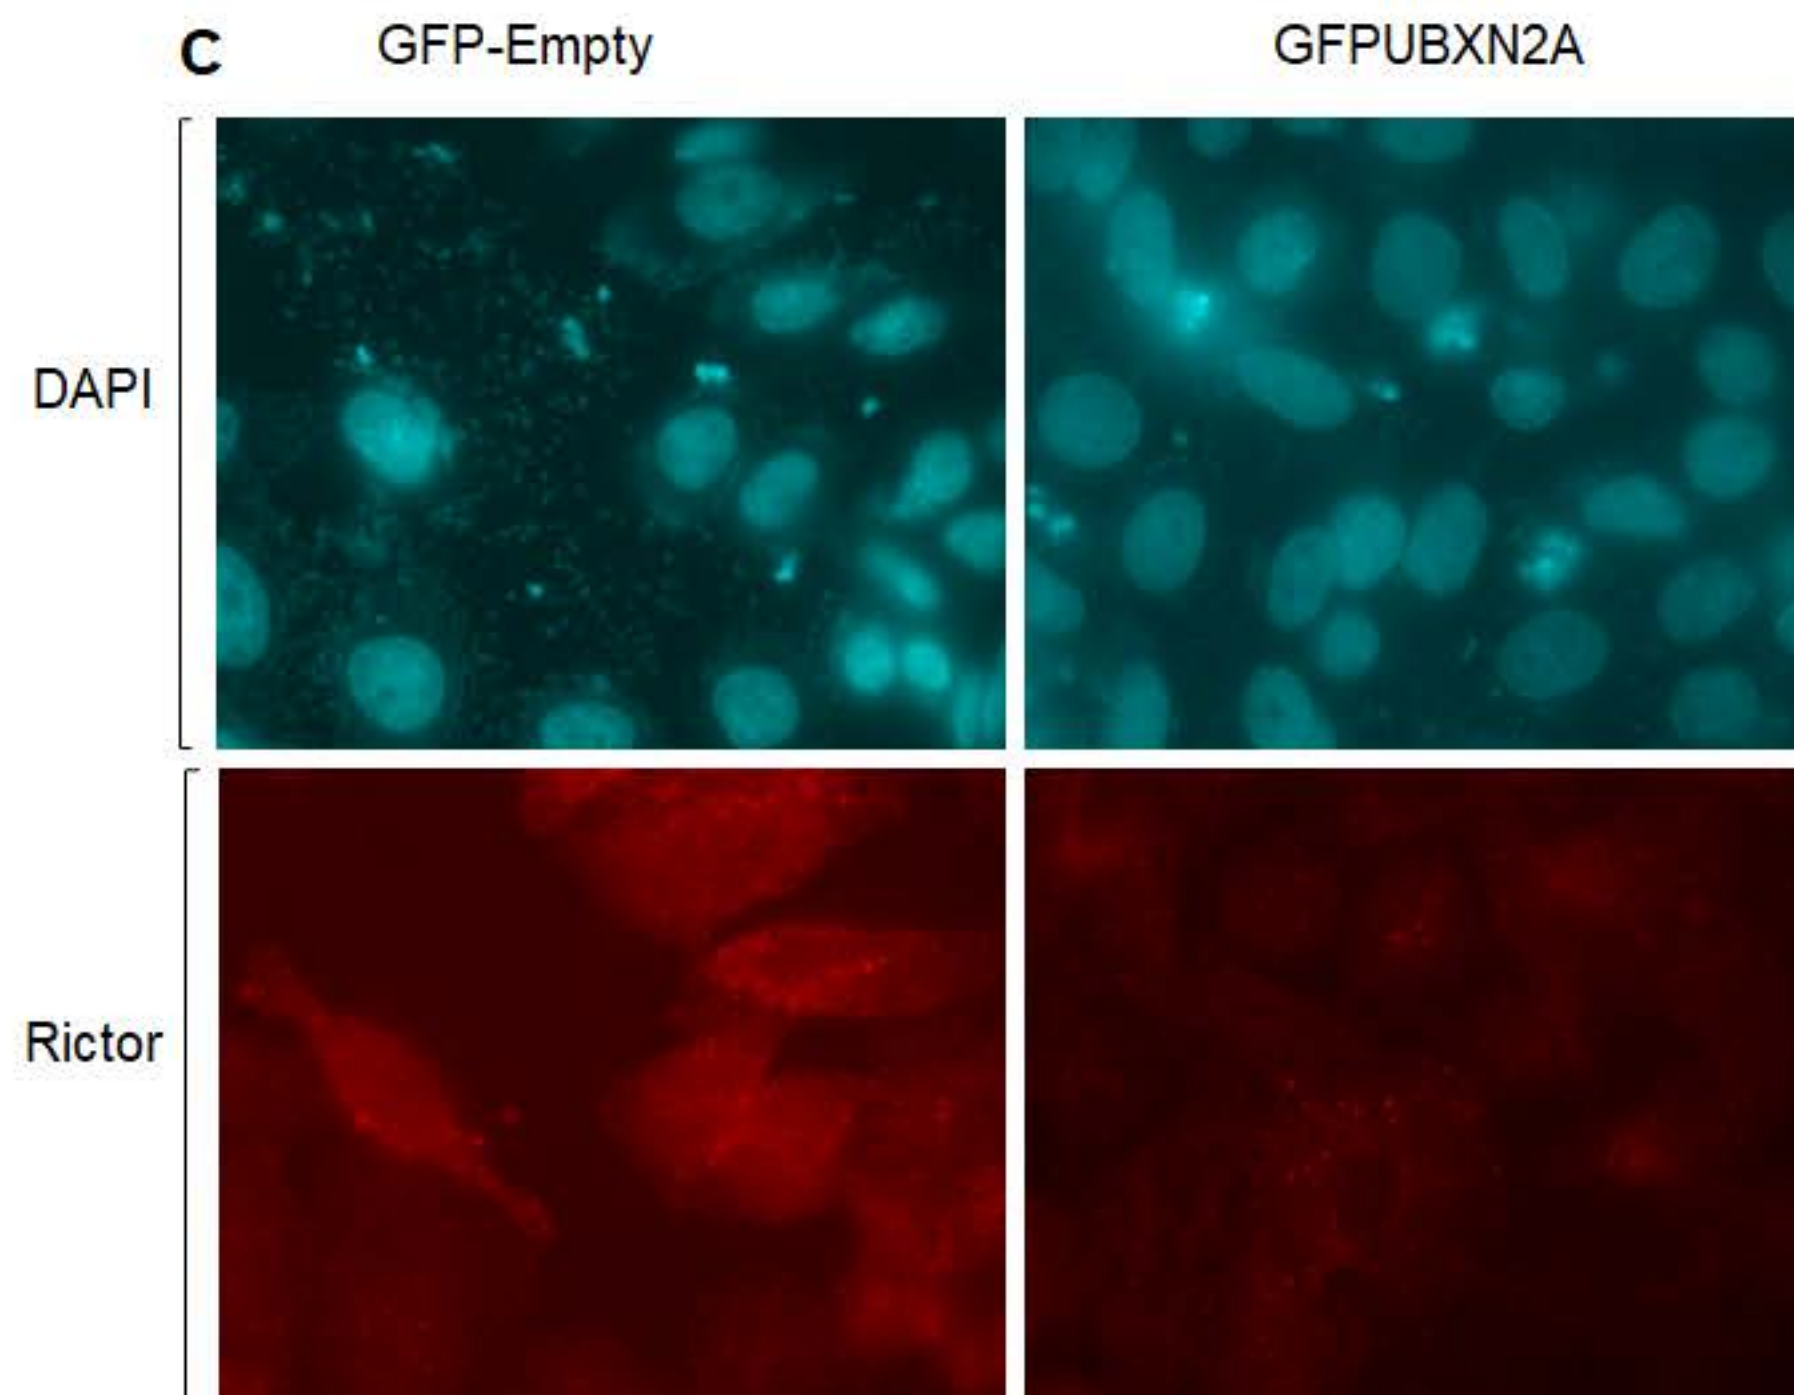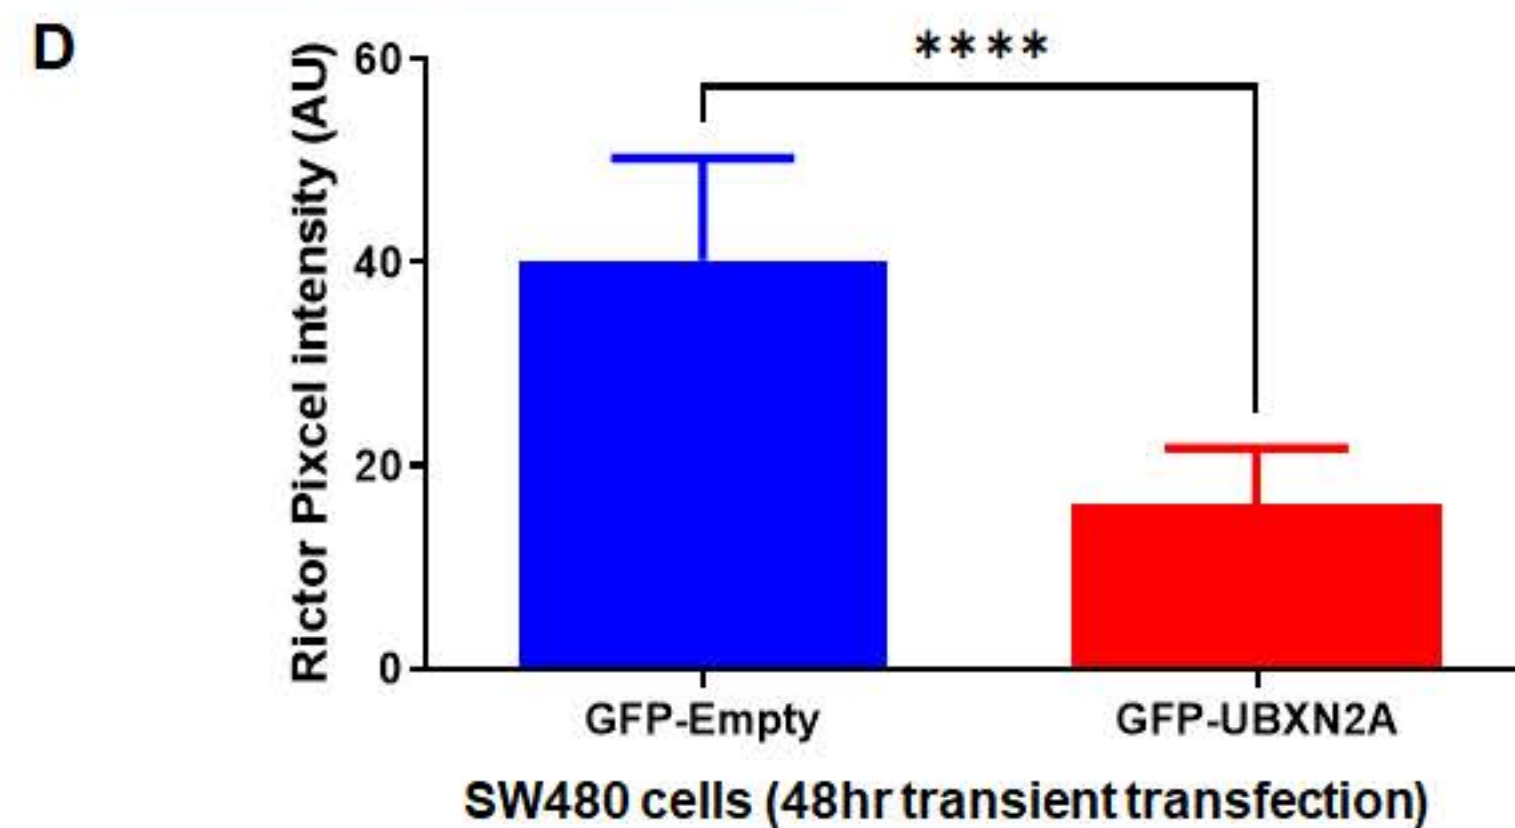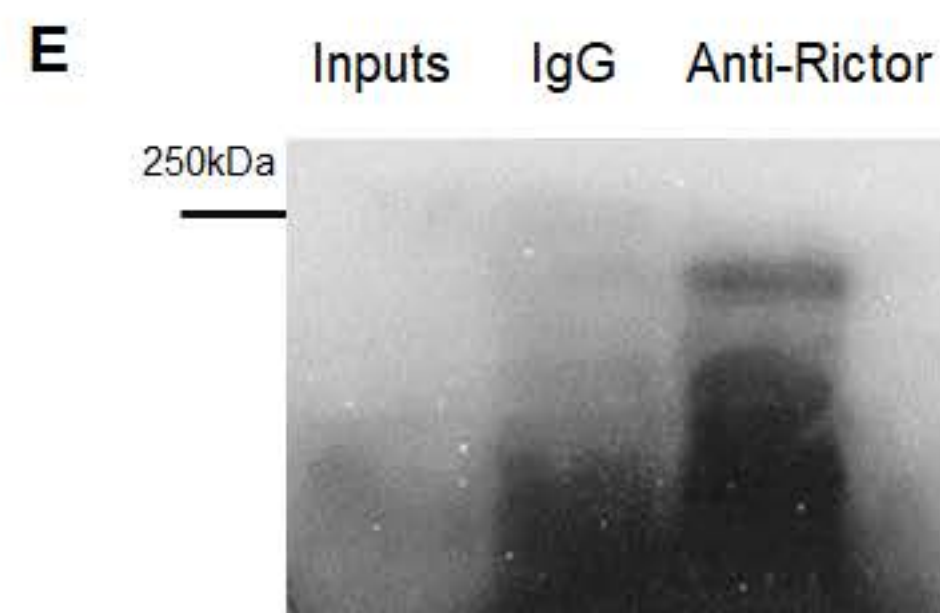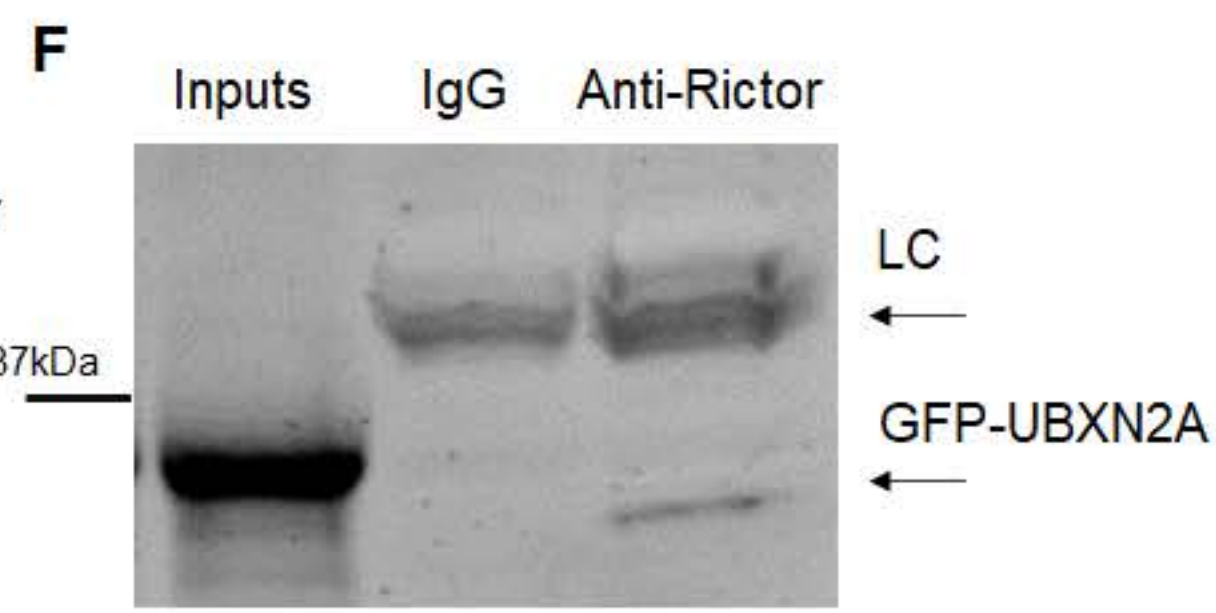

IP: Anti-Rictor polyclonal (Proteintech)  
 IB:: Anti-Rictor Monoclonal (Sigma)-Panel E  
 IB: Anti-UBXN2A polyclonal-panel F  
 LC: Light chain

HCT-116 expressing DDK-Empty vector

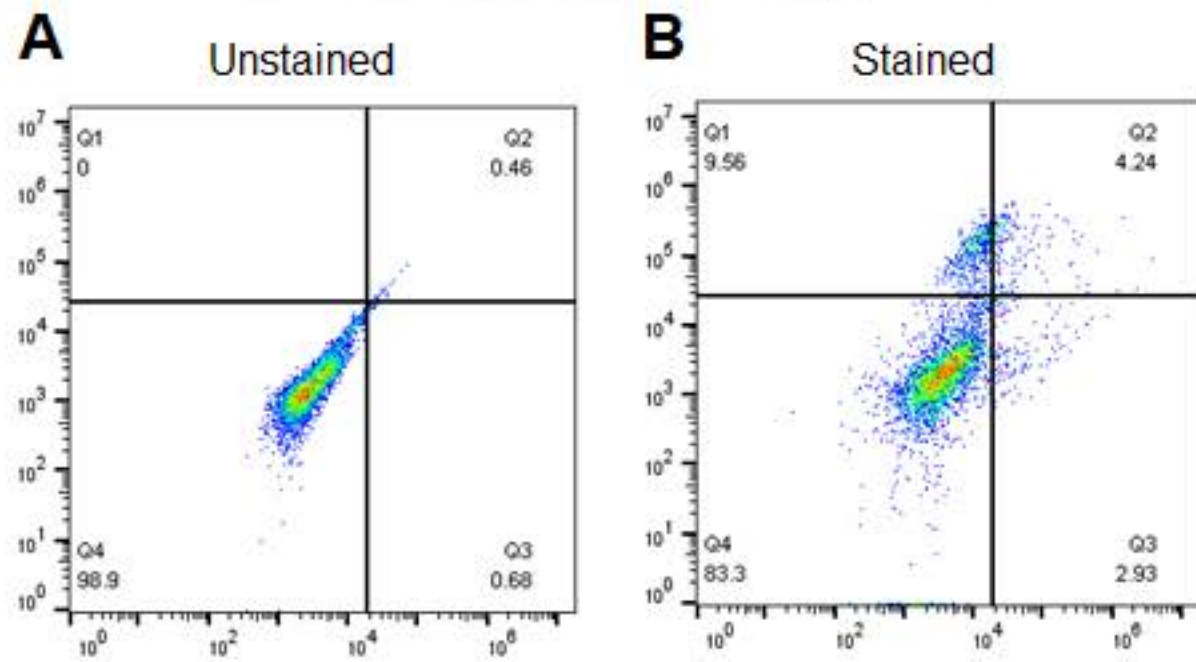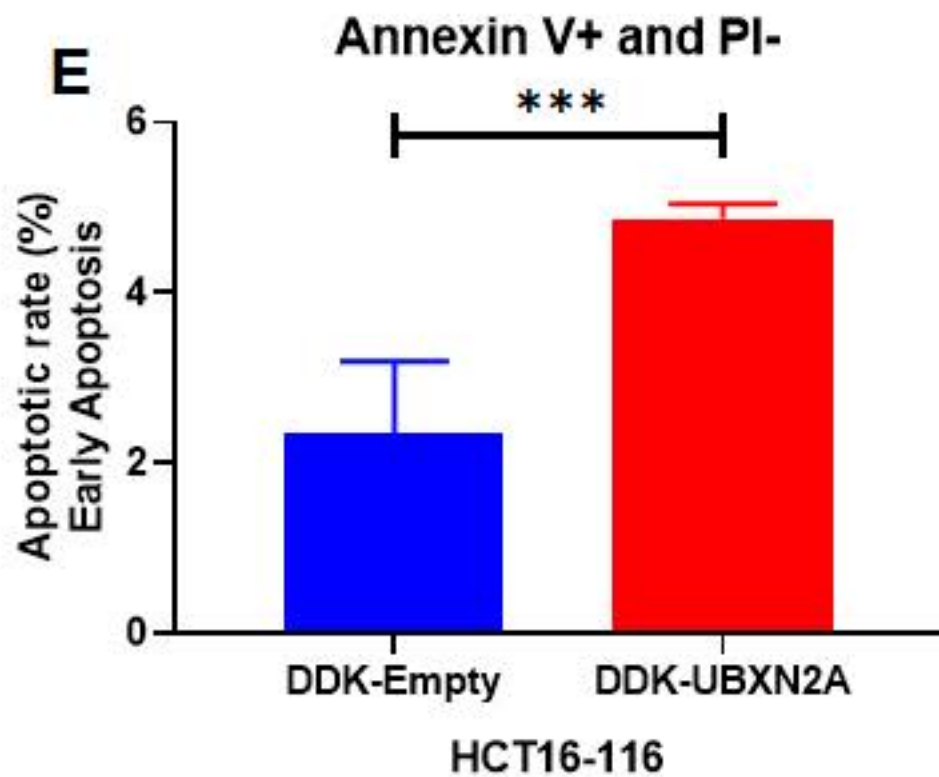

HCT-116 expressing DDK-UBXN2A vector

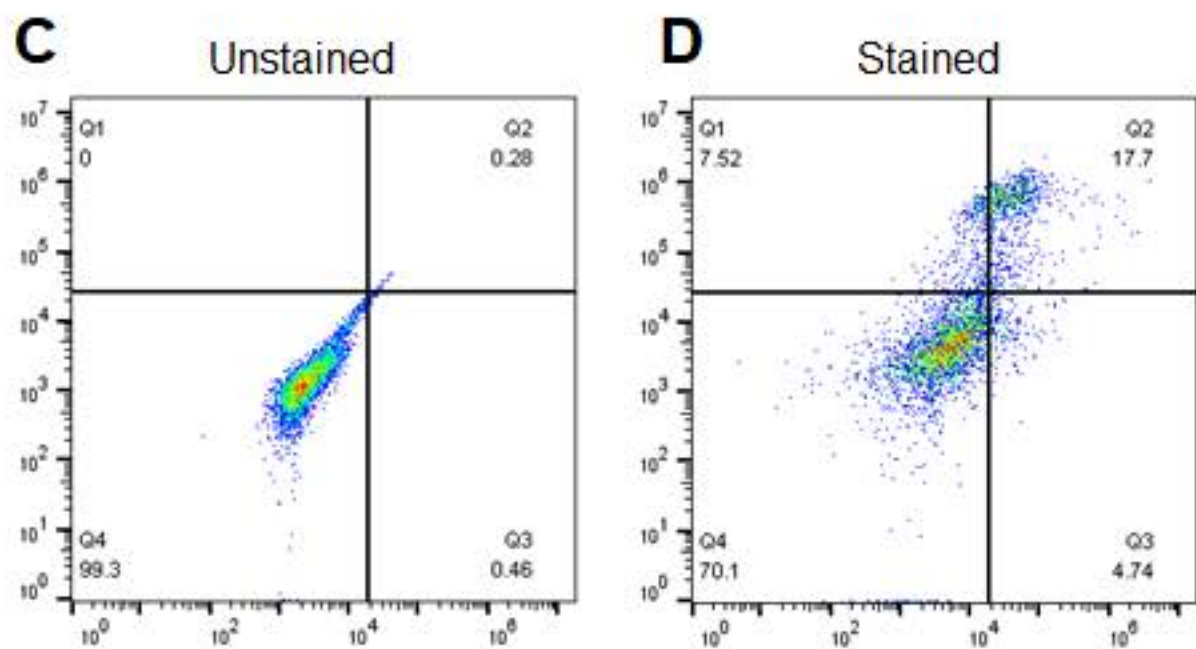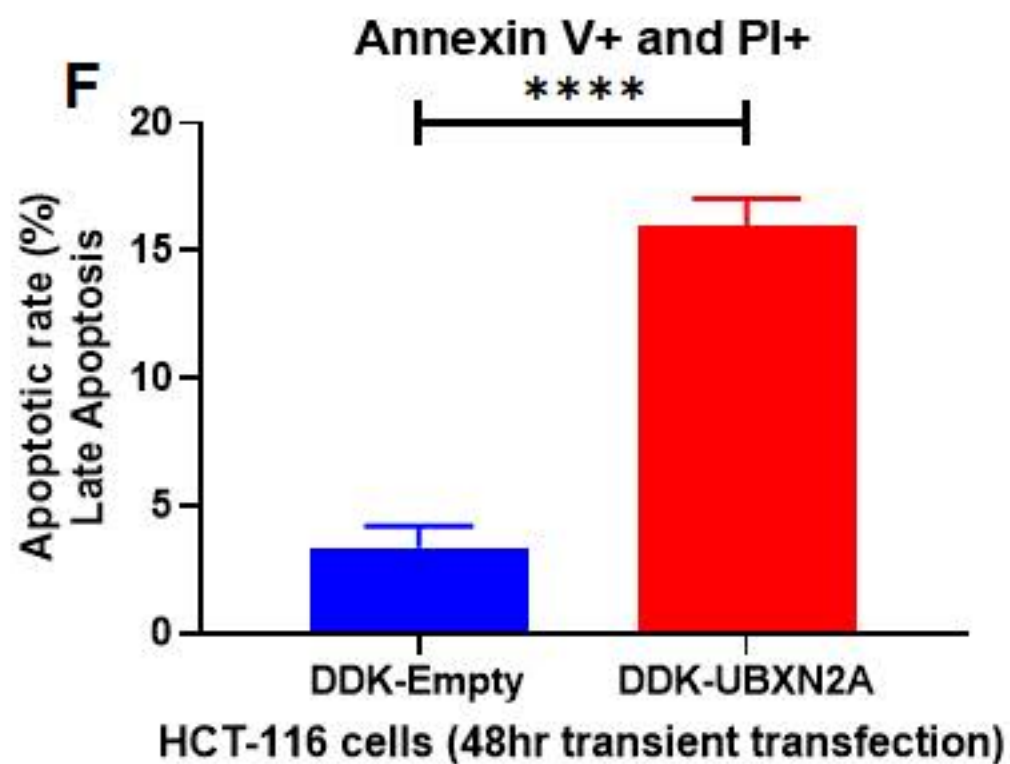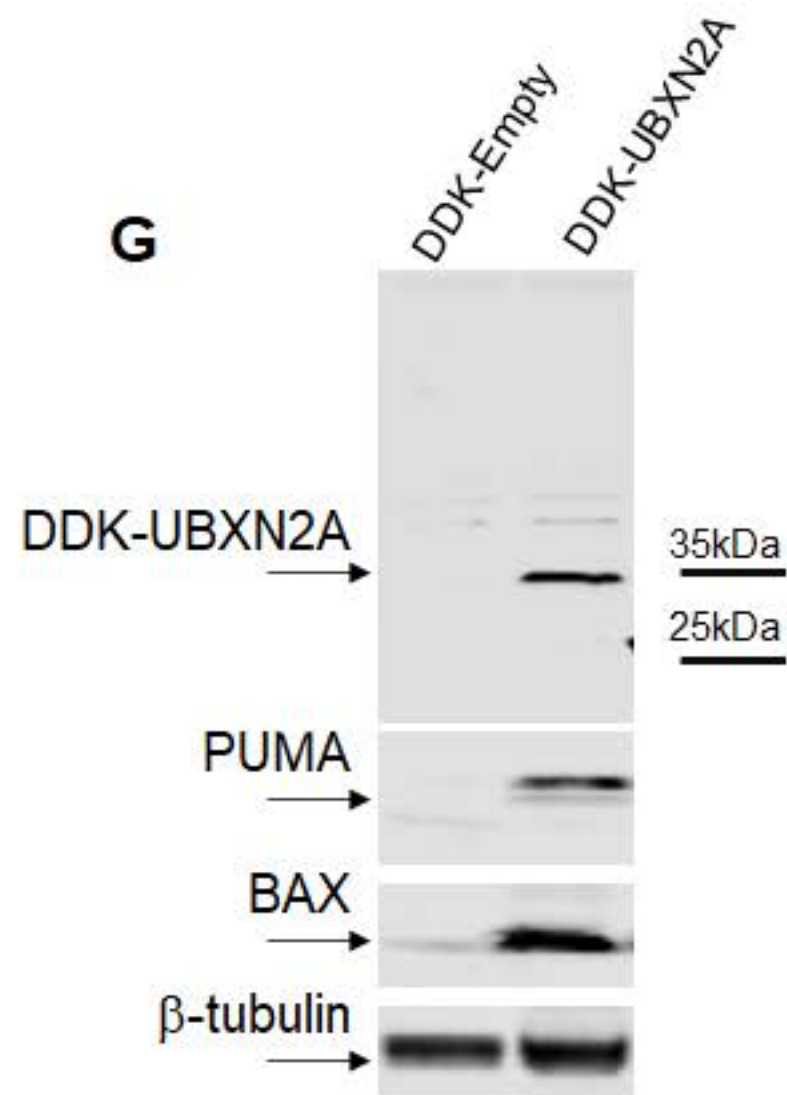

Comp-FL13-A:: PI-A

Comp-FL1-A:: FITC-Annexin V-A

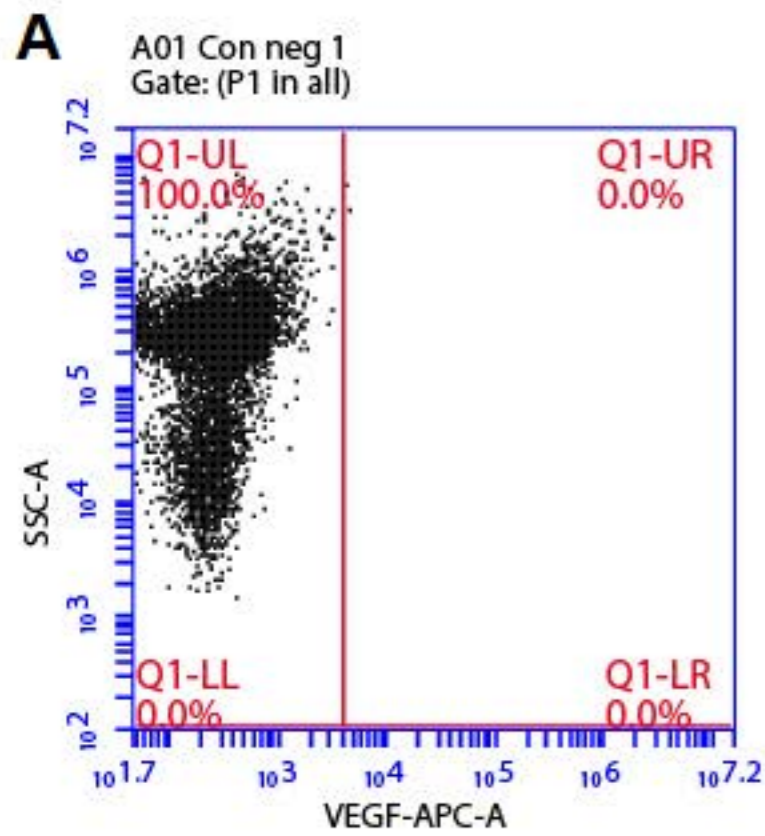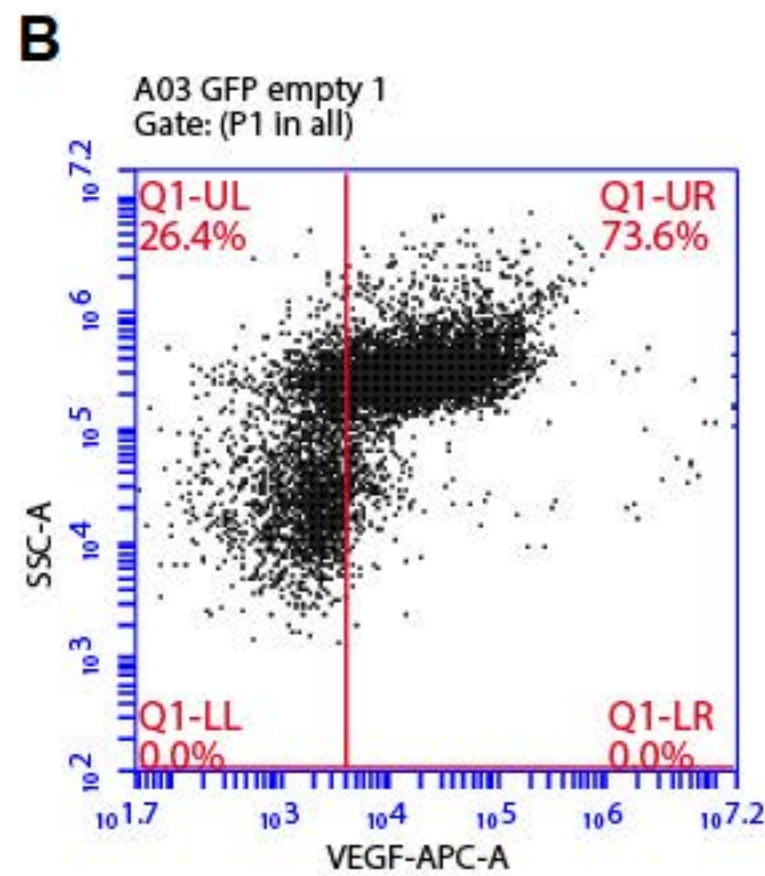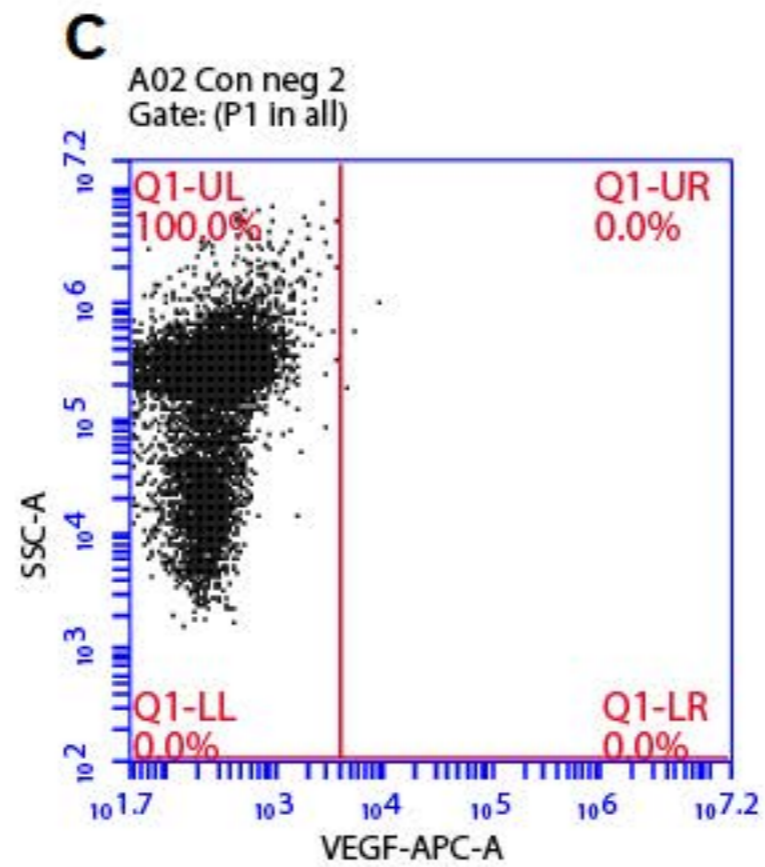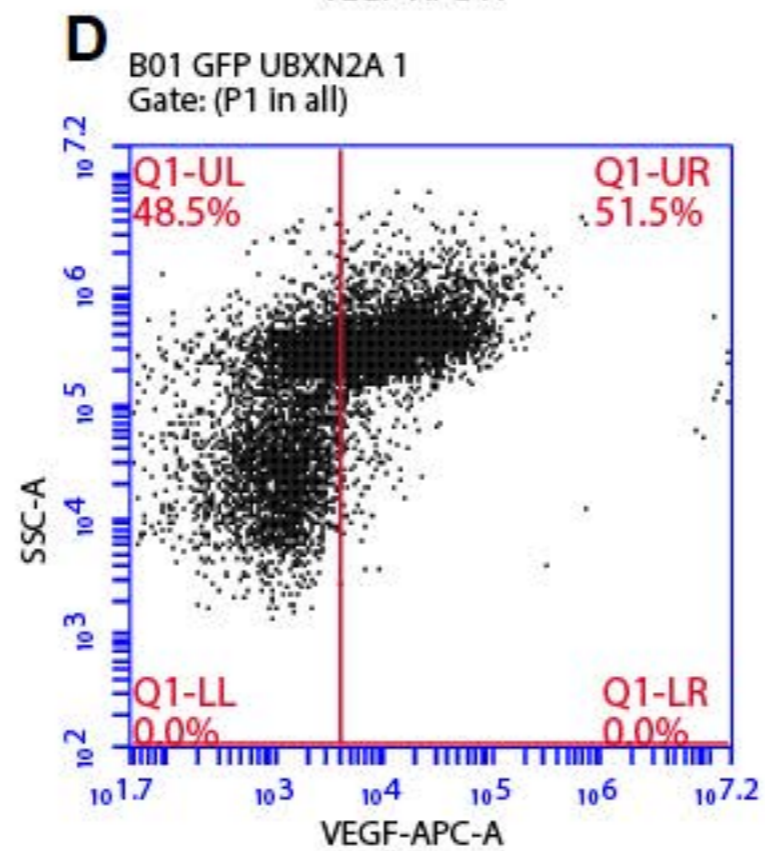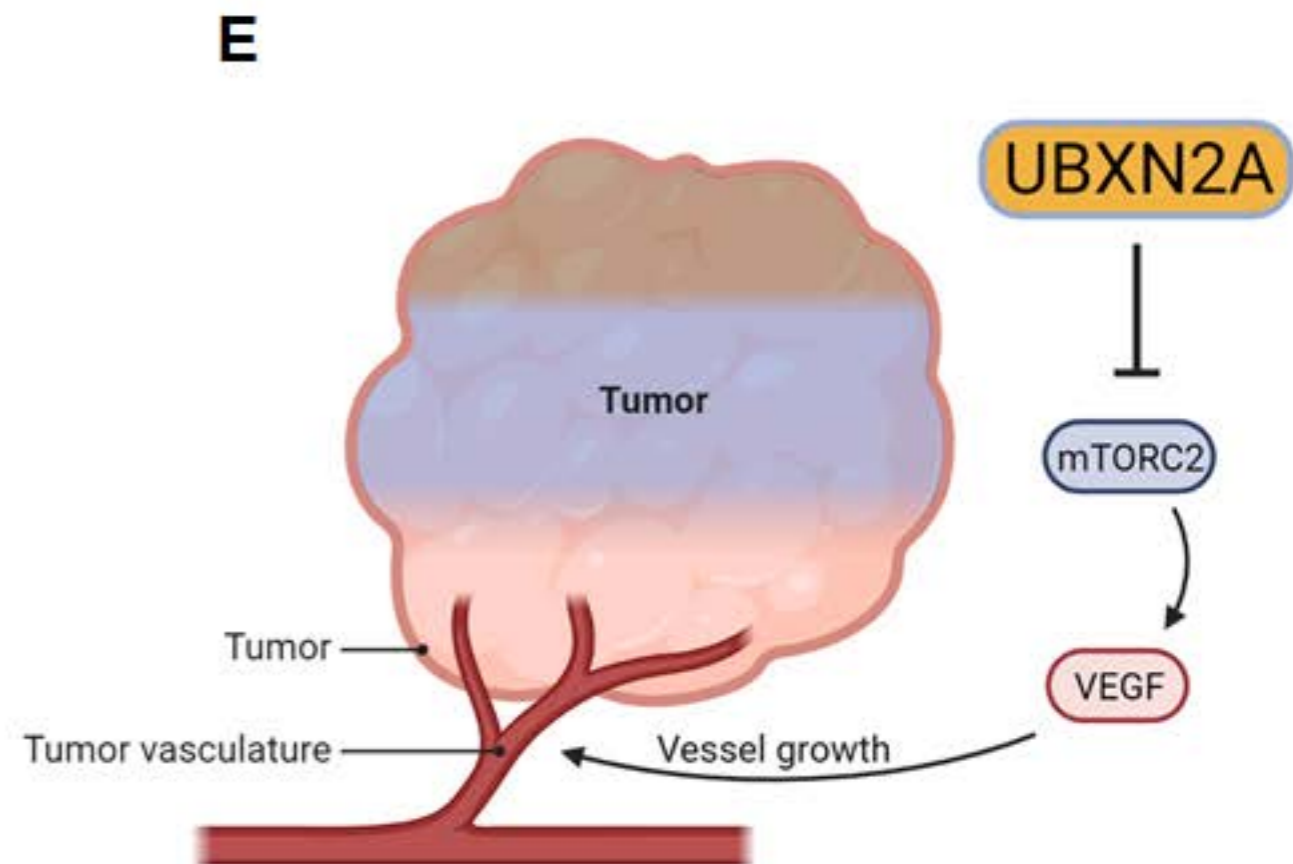

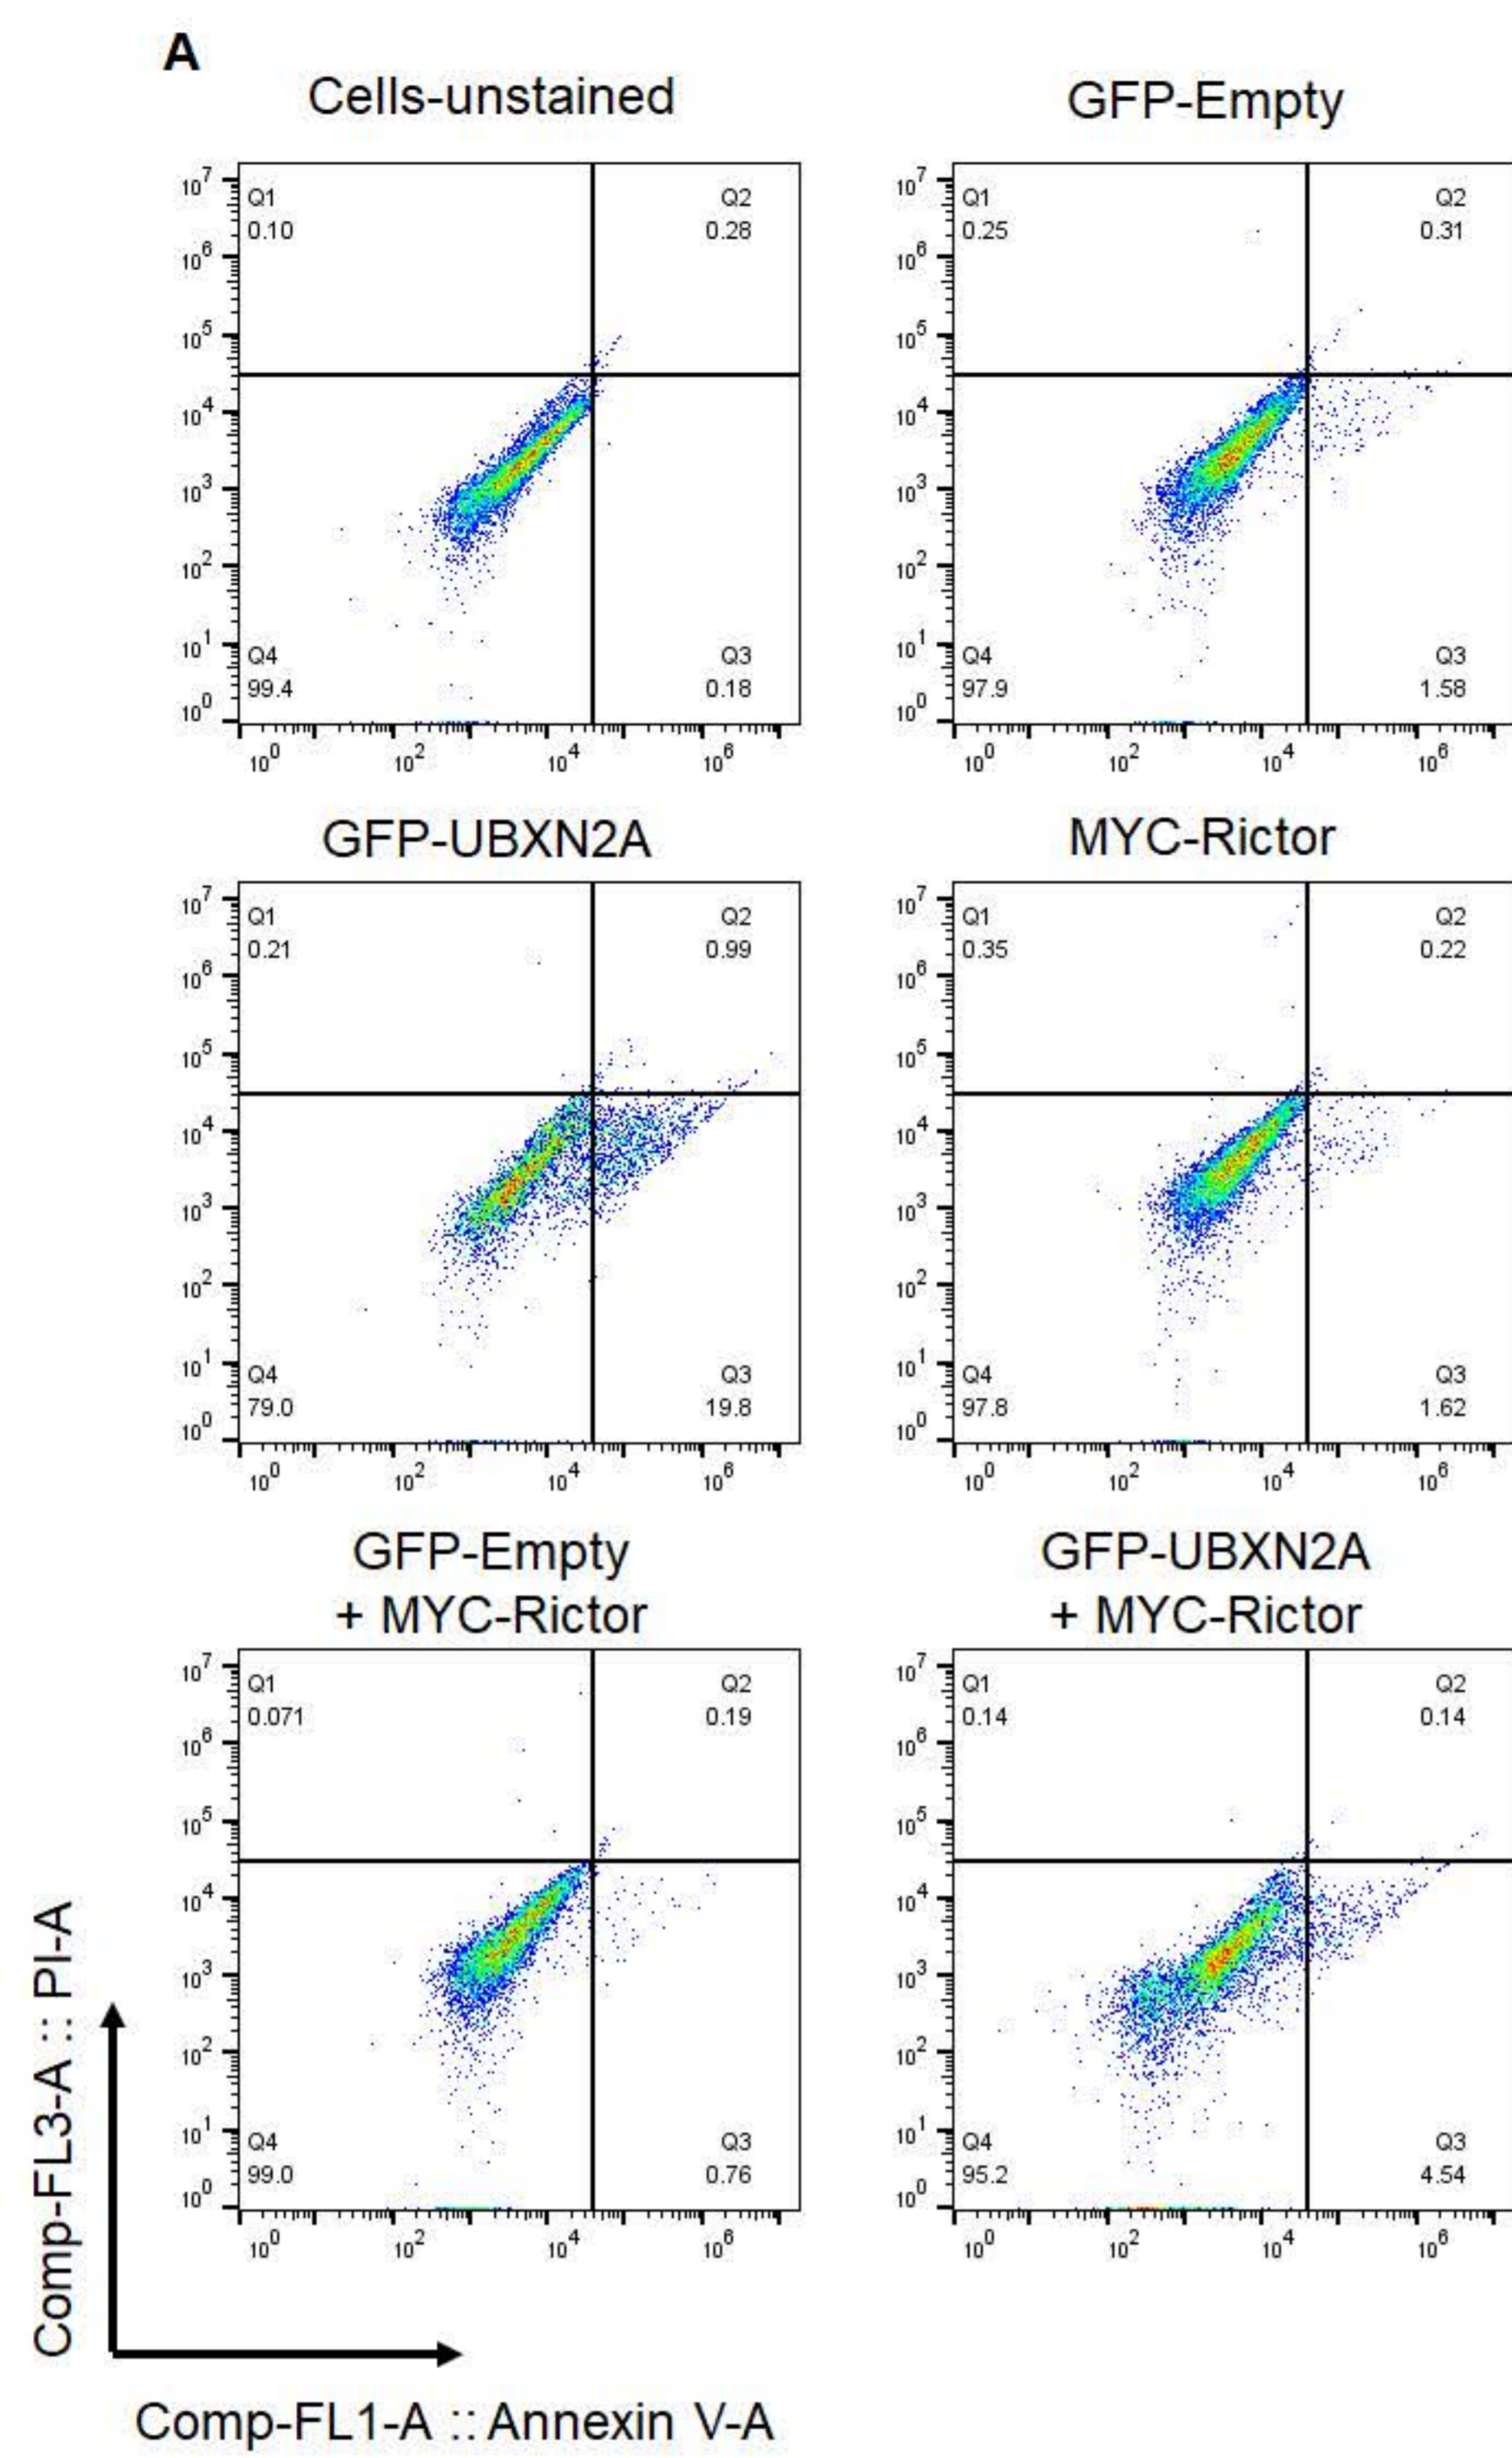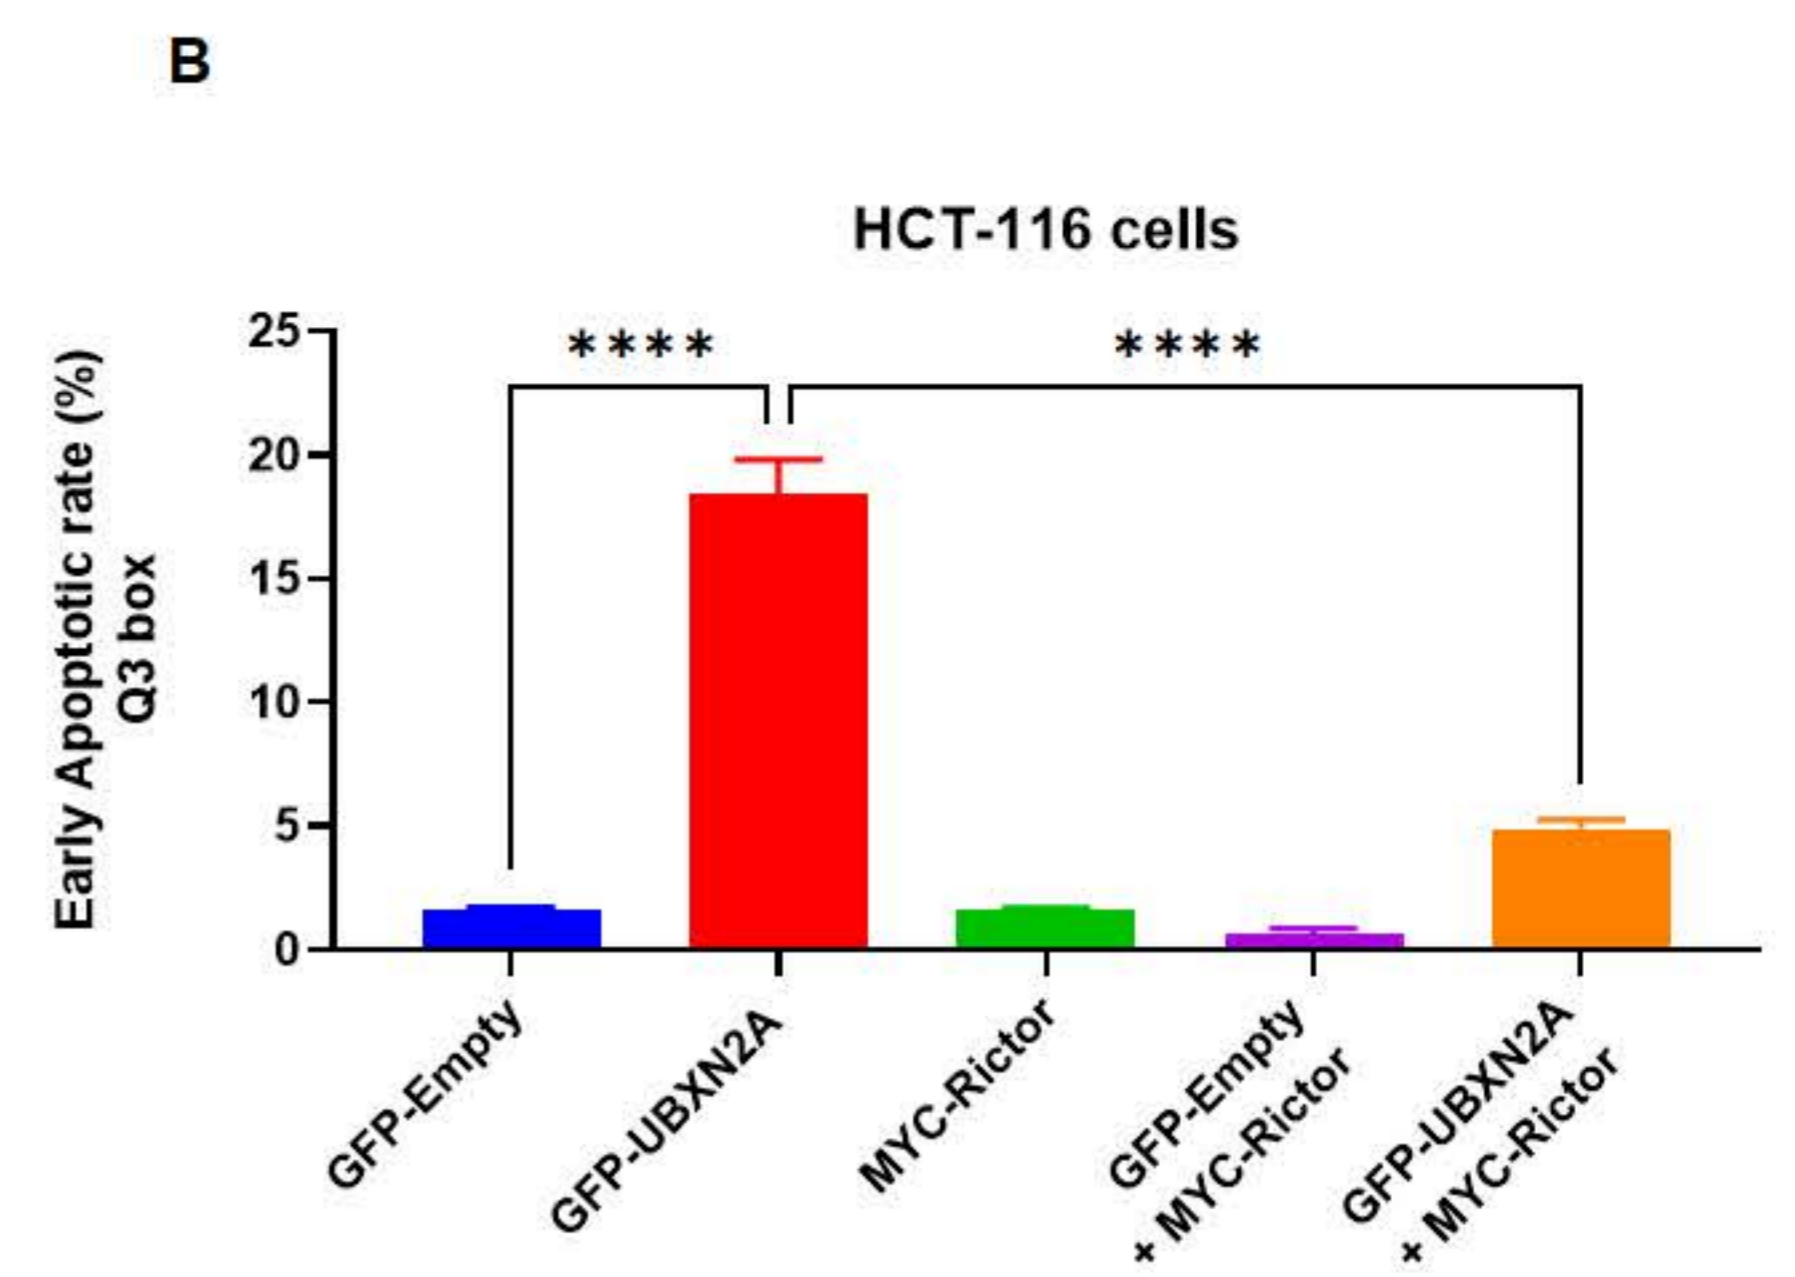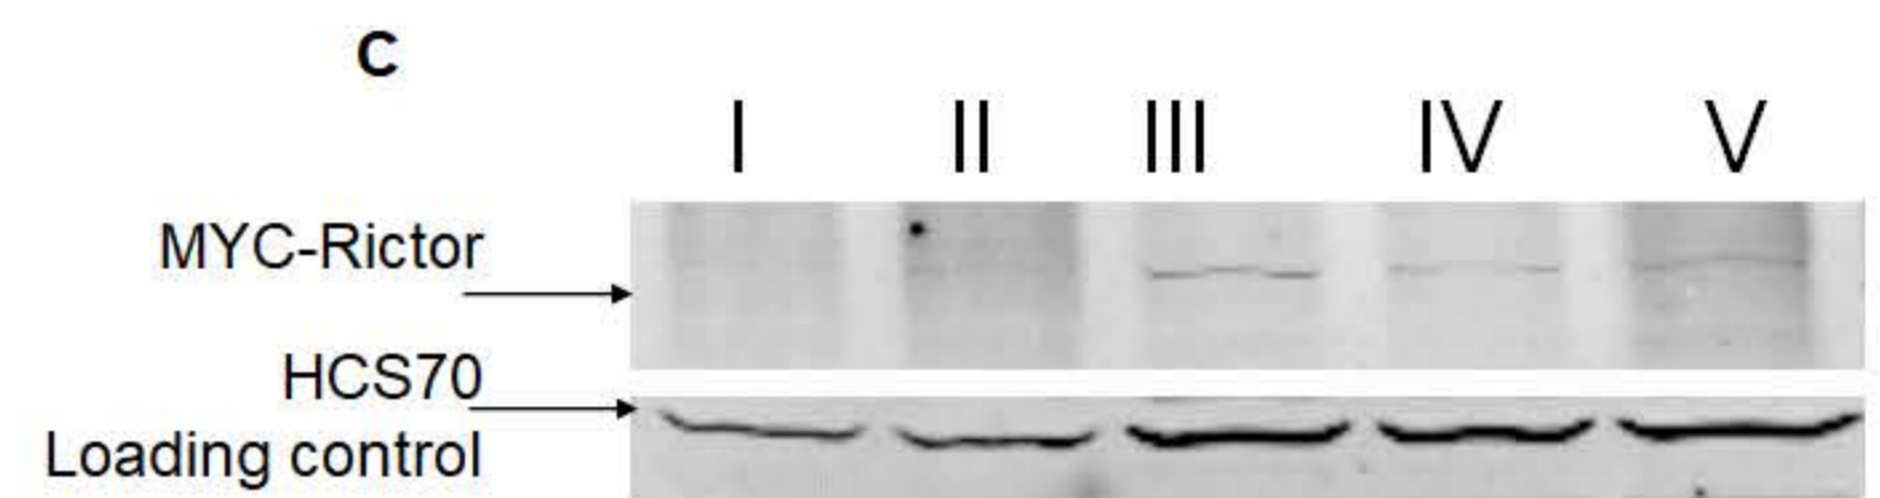

I: GFP-Empty  
II: GFP-UBXN2A  
III: MYC-Rictor  
IV: GFP-Empty + MYC-Rictor  
V: GFP-UBXN2A + MYC-Rictor

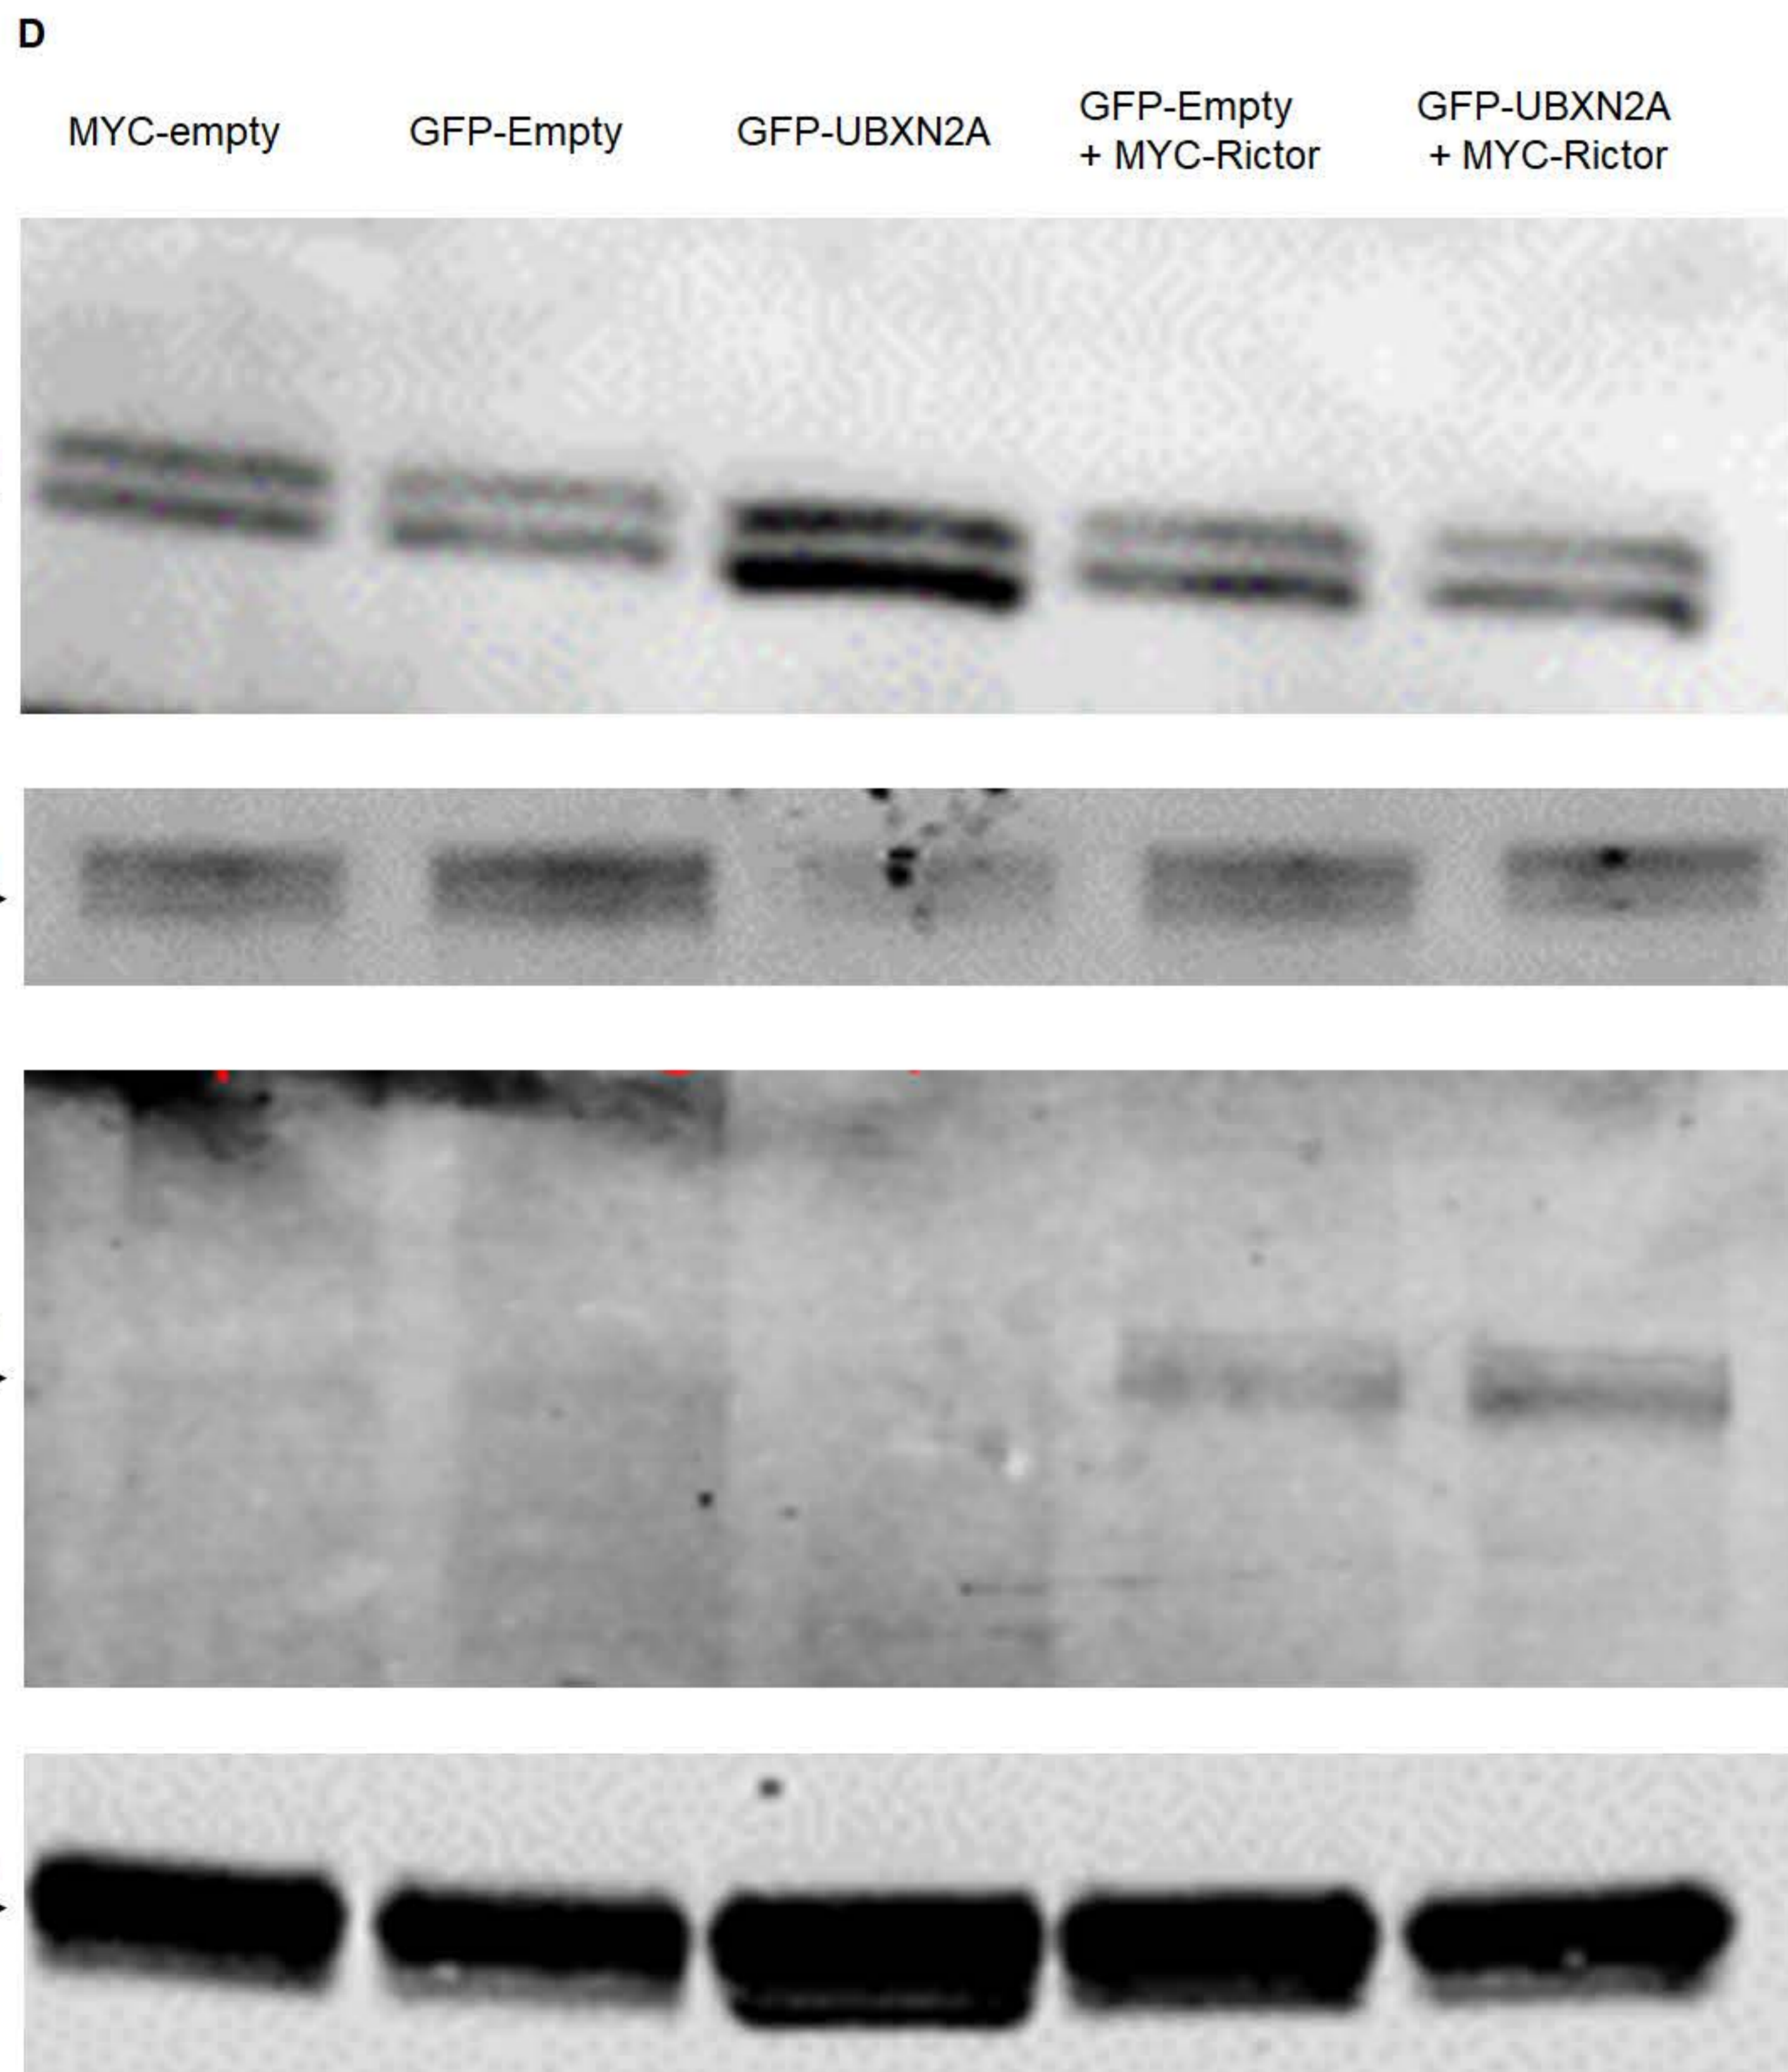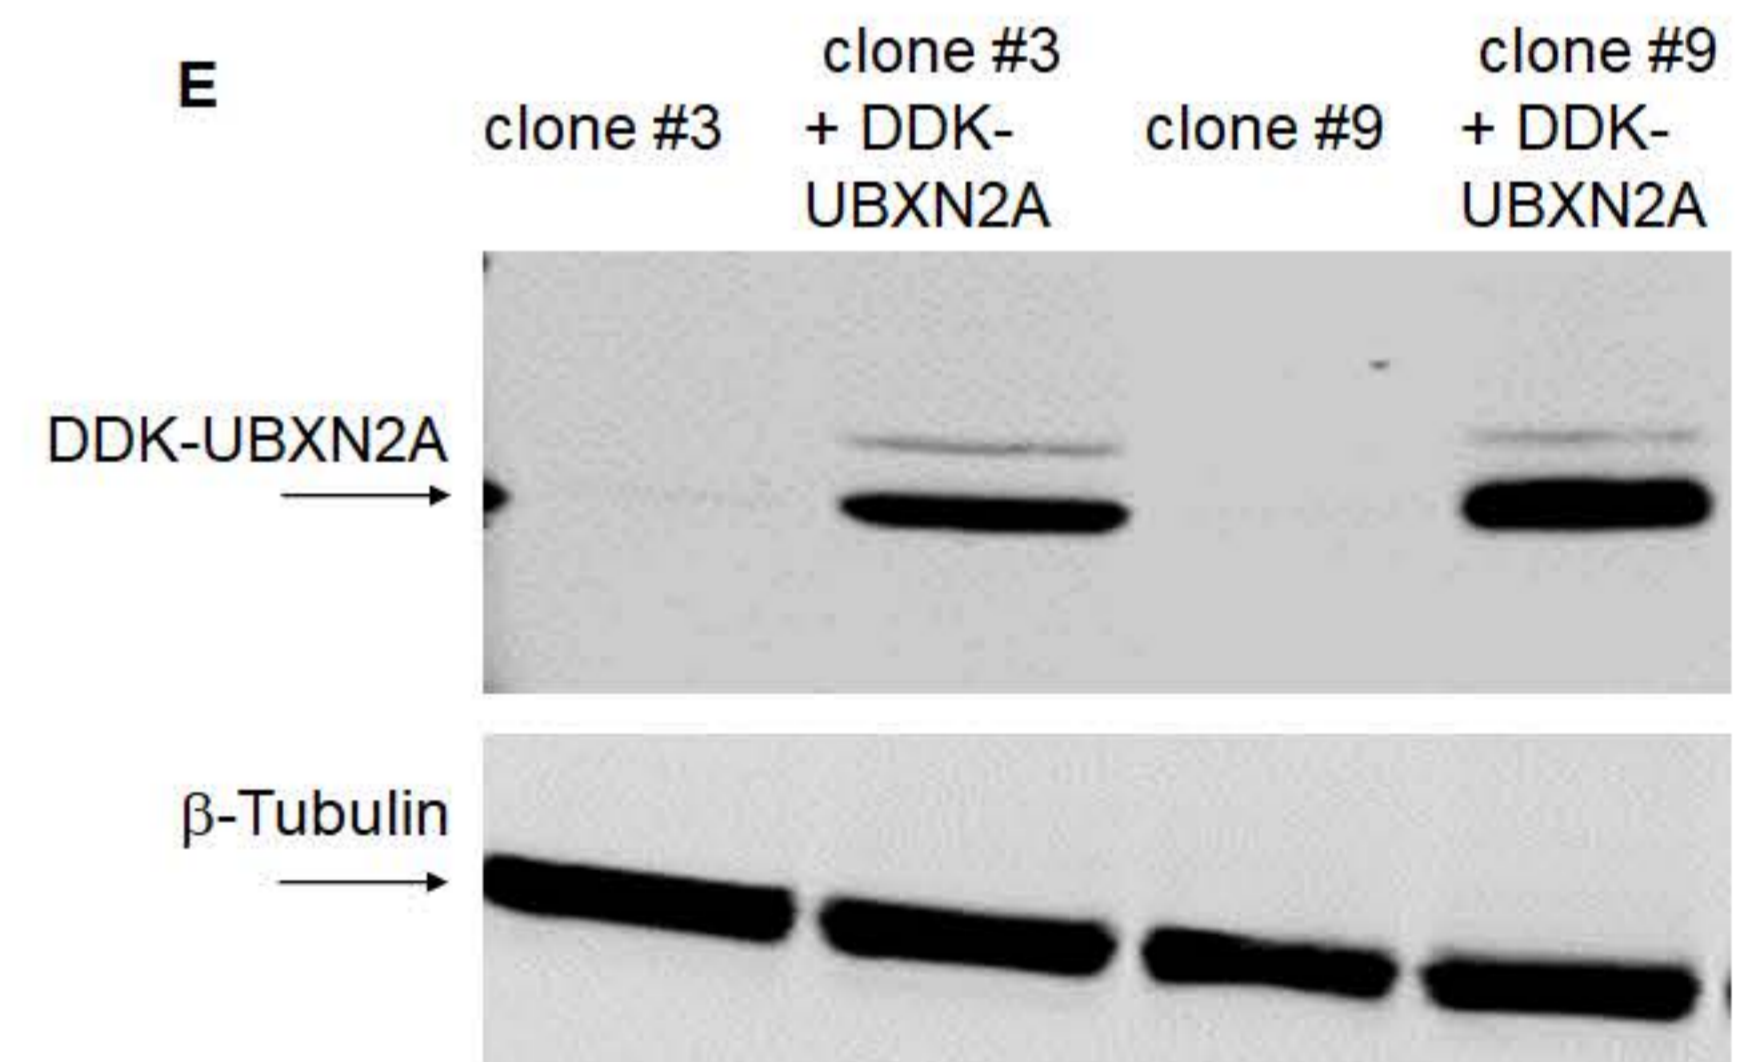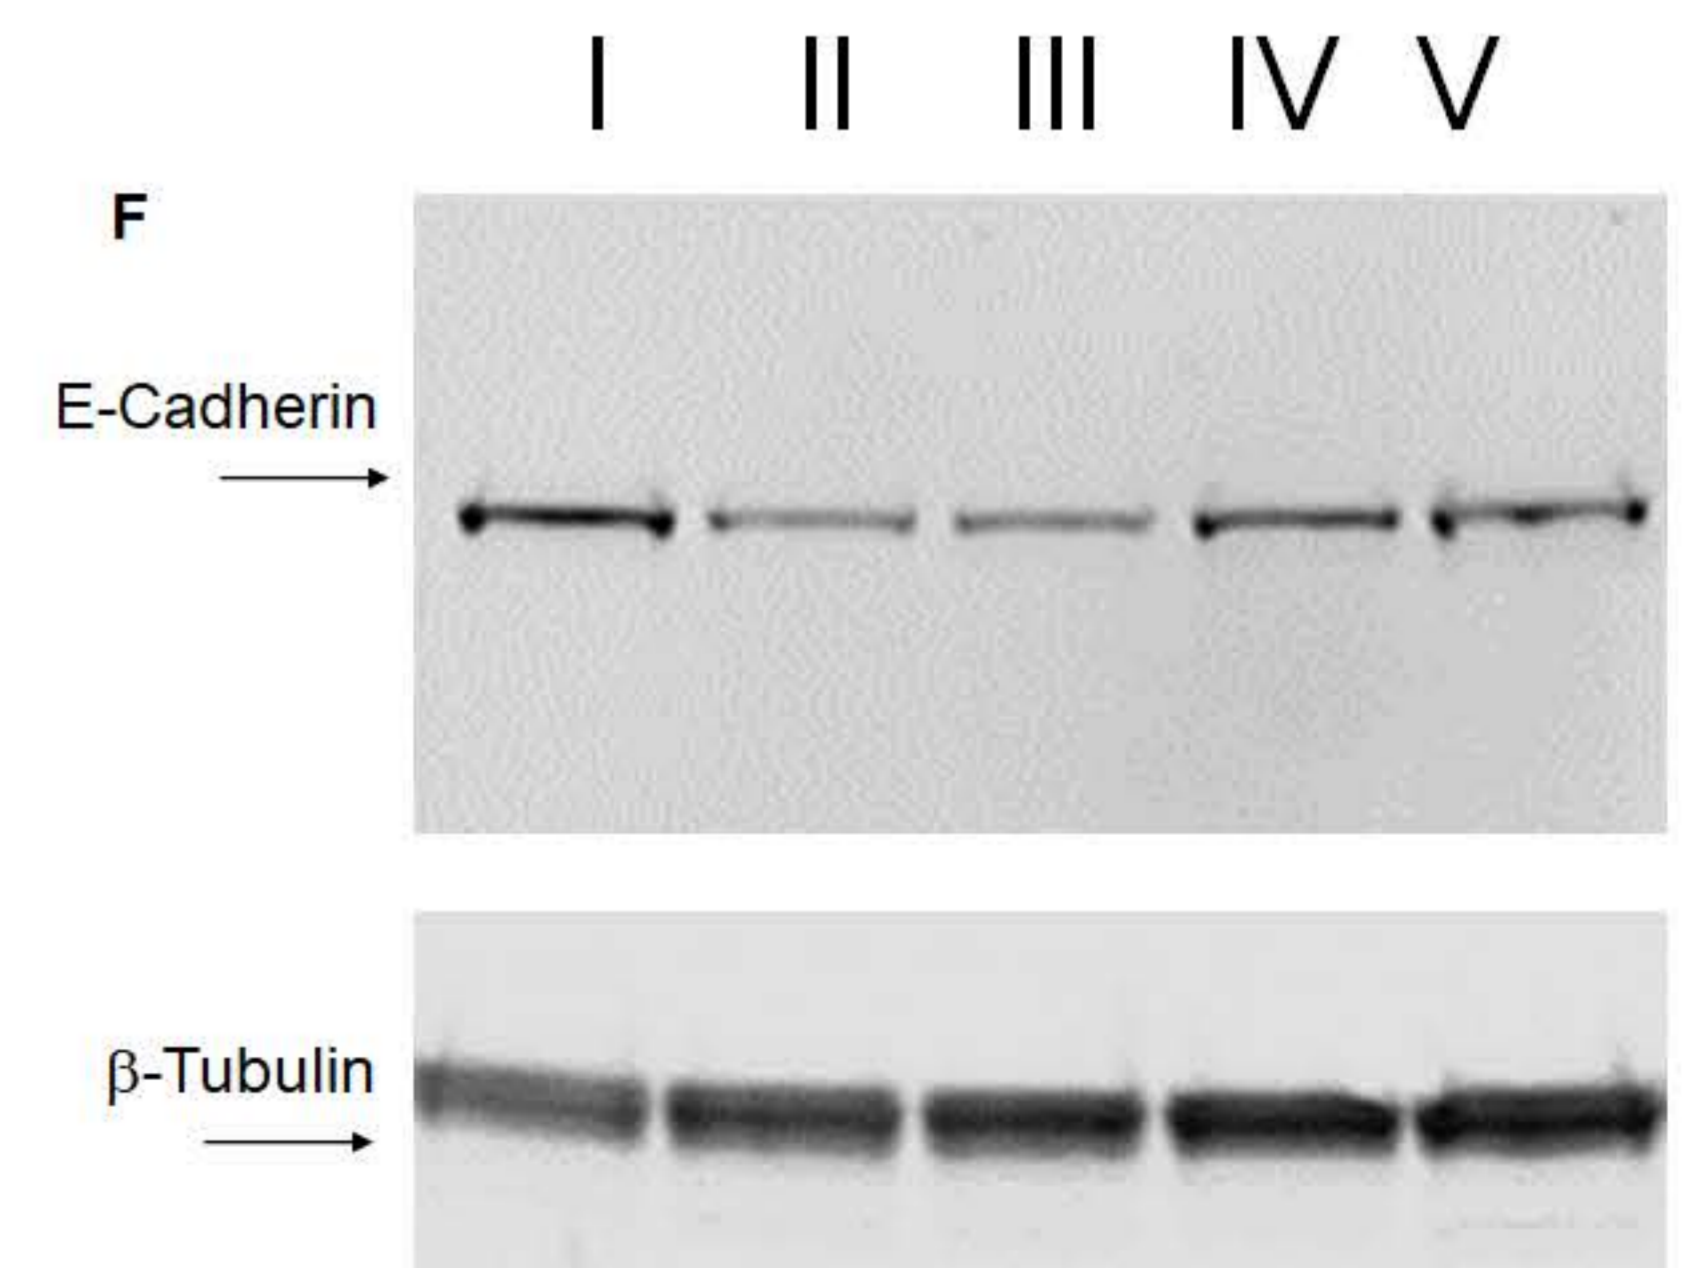

I: WT cells  
II: Clone #3 UBXN2A KO  
III: Clone #9 UBXN2A KO  
IV: Clone #3 UBXN2A KO plus DDK-UBXN2A  
V: Clone #9 UBXN2A KO plus DDK-UBXN2A

**A**DDK-Empty-unstained  
(Control)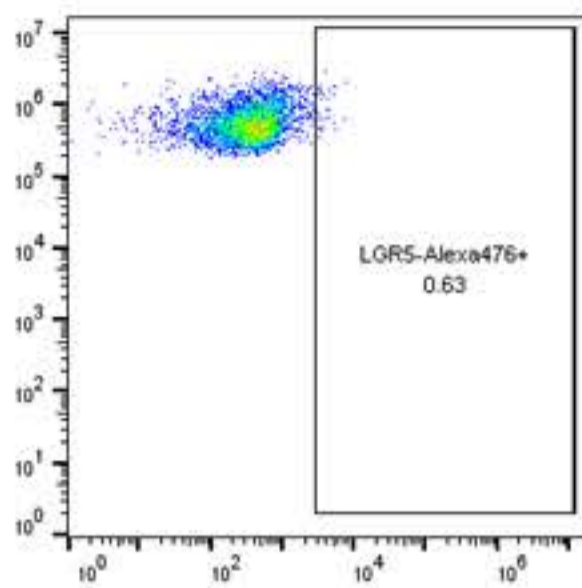**B**DDK-Empty  
Alexa fluor 647 Rat IgG2b,  $\kappa$  Isotype  
(Control)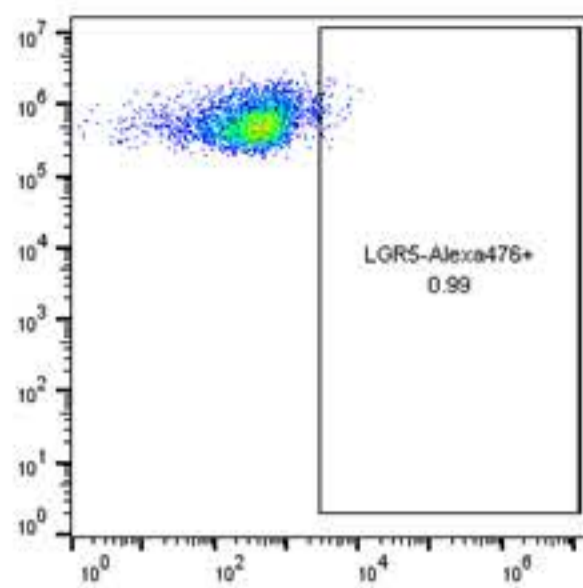**C**DDK-Empty  
Alexa Fluor 647  
Rat Anti-Human Lgr5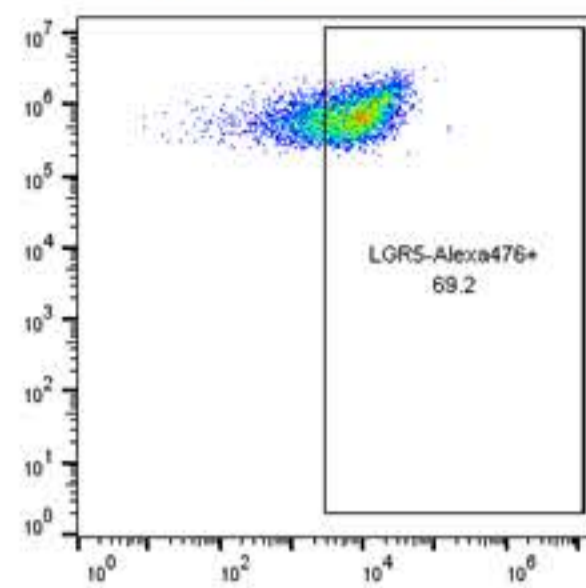**D**DDK-UBXN2A-unstained  
(Control)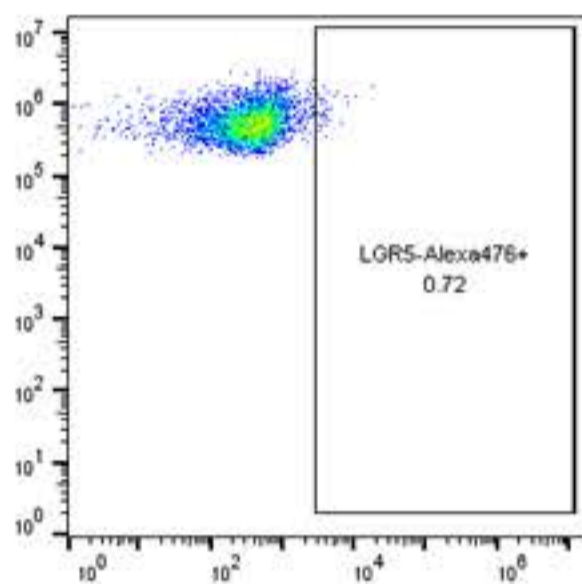**E**DDK-UBXN2A  
Alexa fluor 647 Rat IgG2b,  $\kappa$  Isotype  
(Control)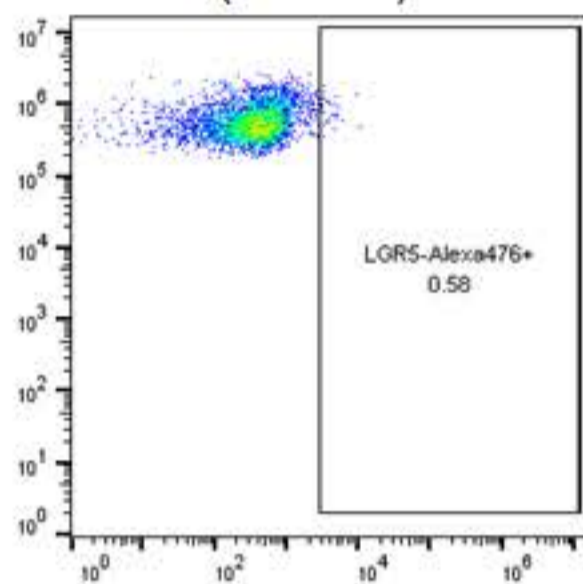**F**DDK-UBXN2A  
Alexa Fluor 647  
Rat Anti-Human Lgr5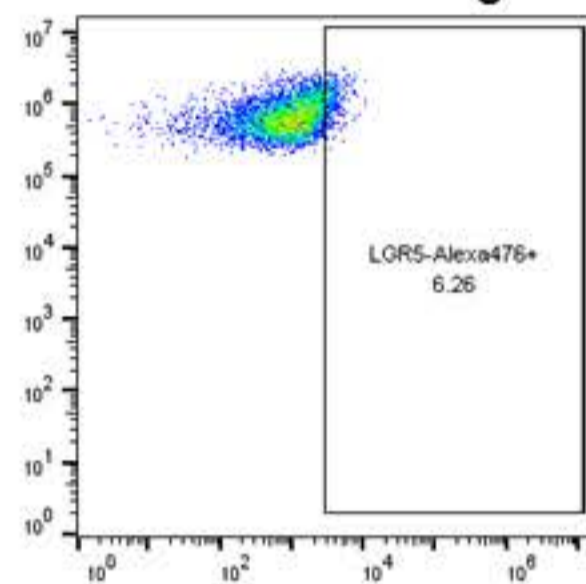

Como-FL4-A::LGR5-Alexa476-A

**G**DDK-Empty-unstained  
(Control)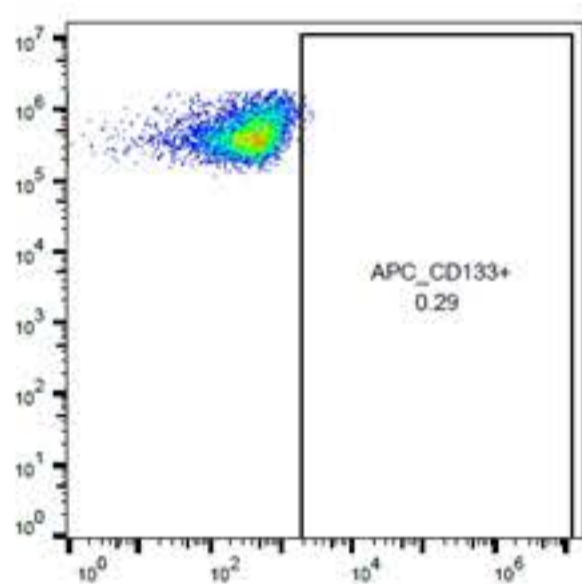**H**DDK-Empty  
APC Mouse IgG1  $\kappa$  Isotype  
(Control)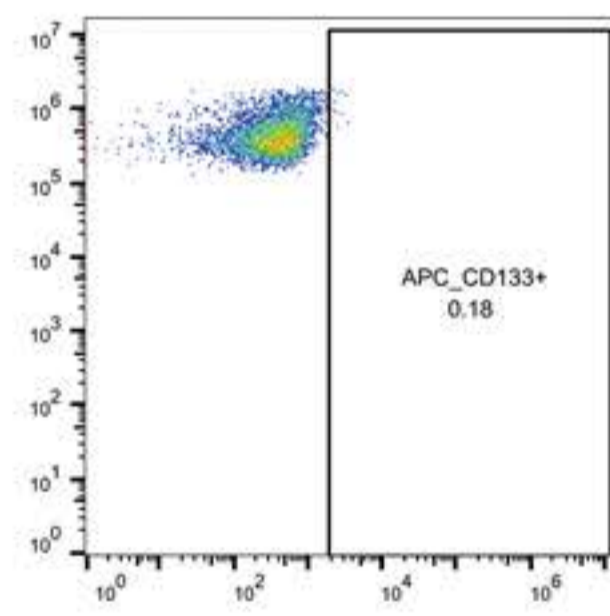**I**DDK-Empty  
APC Mouse Anti-Human CD133  
Clone W6B3C1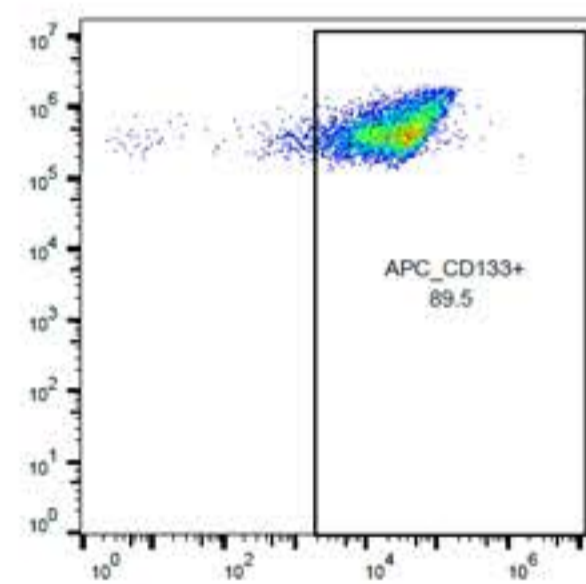**J**DDK-UBXN2A-unstained  
(Control)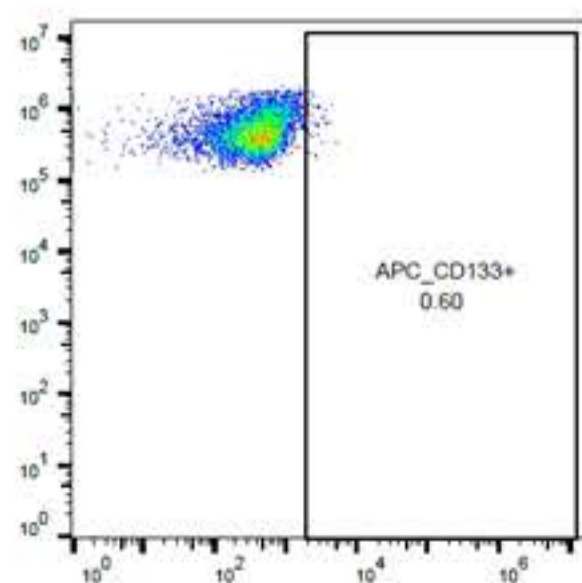**K**DDK-UBXN2A  
APC Mouse IgG1  $\kappa$  Isotype  
(Control)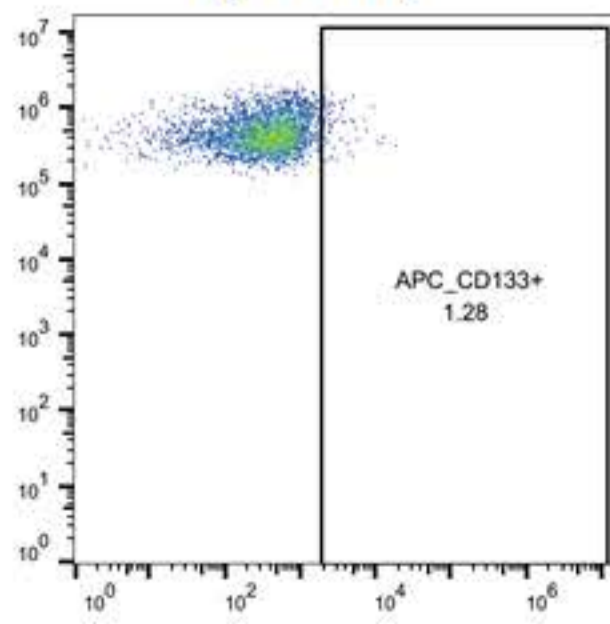**L**DDK-UBXN2A  
APC Mouse Anti-Human CD133  
Clone W6B3C1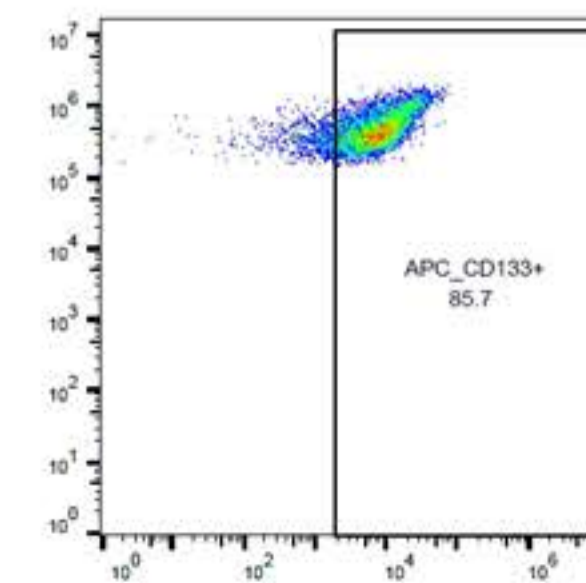

FL4-A :: CD133-APC-A

SSC-A :: SSC-A

SSC-A :: SSC-A

**A** DDK-Empty-unstained  
Control

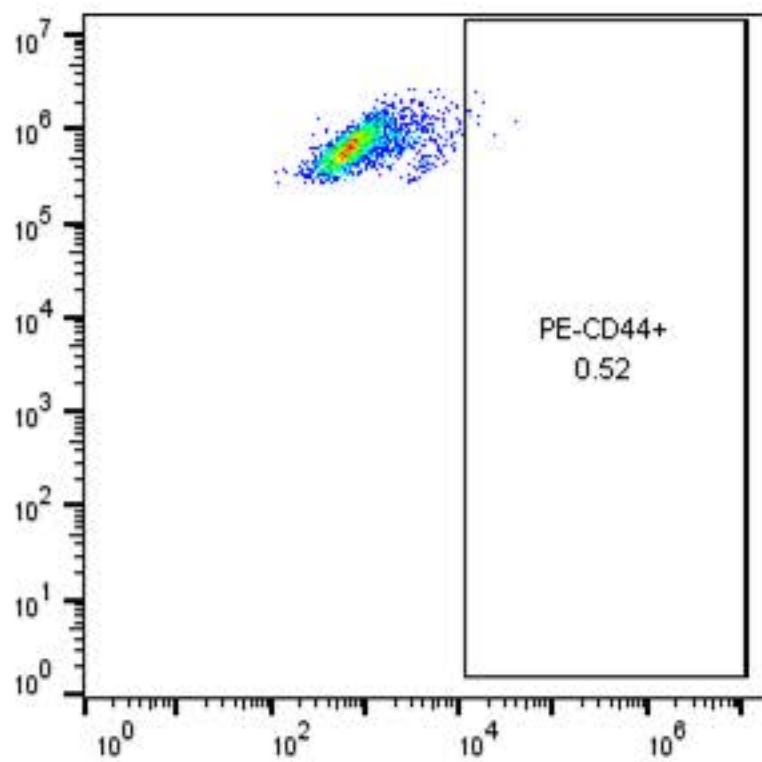

**B** DDK-Empty  
PE Mouse IgG2b  $\kappa$  Isotype  
Control

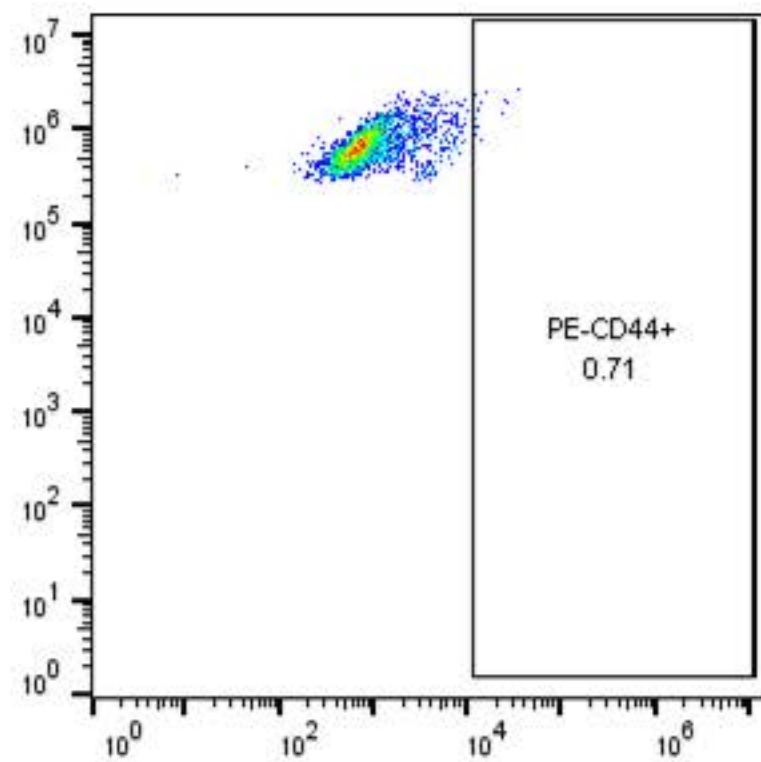

**C** DDK-Empty  
PE Mouse Anti-Human CD44  
Clone G44-26

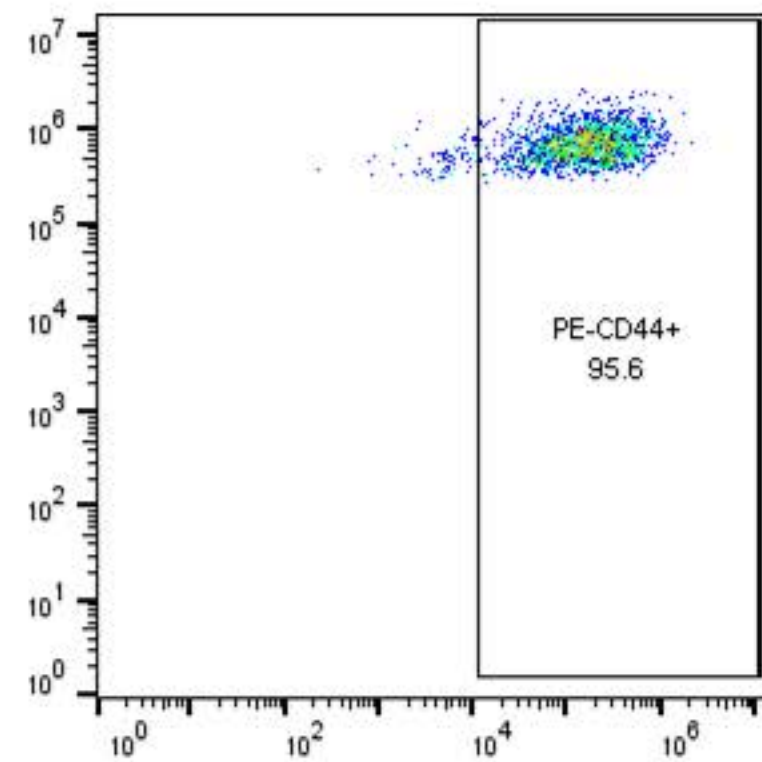

**D** DDK-UBXN2A-unstained  
Control

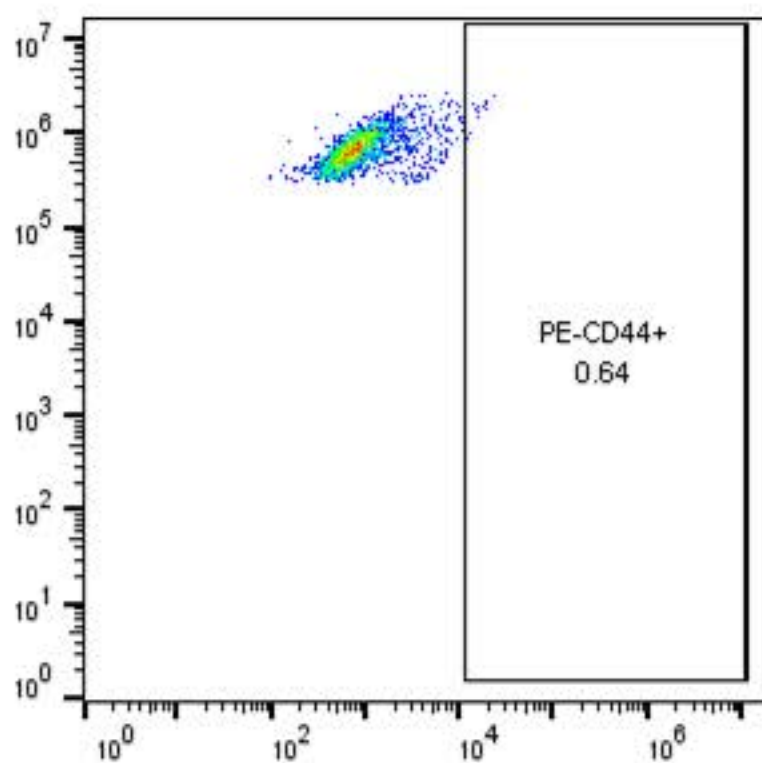

**E** DDK-UBXN2A  
PE Mouse IgG2b  $\kappa$  Isotype  
Control

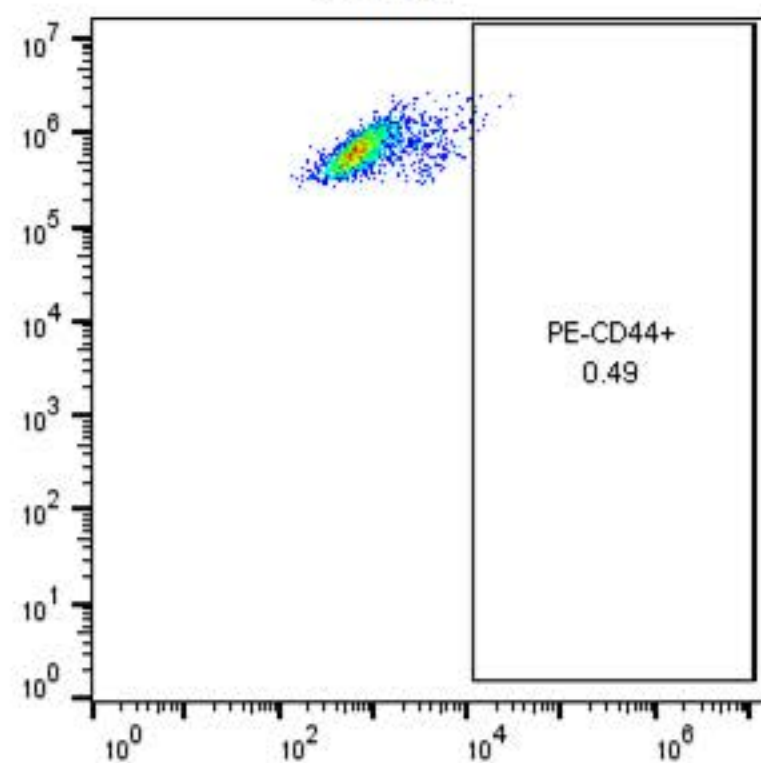

**F** DDK-UBXN2A  
PE Mouse Anti-Human CD44  
Clone G44-26

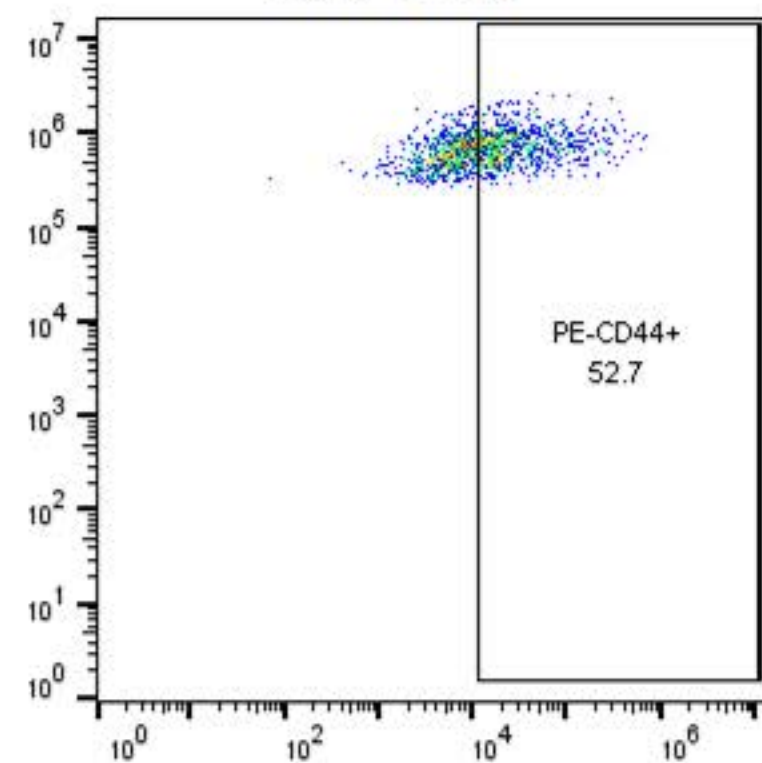

Como-FL2-A::PE-CD44-A



**A** DDK-Empty-unstained  
(Control)

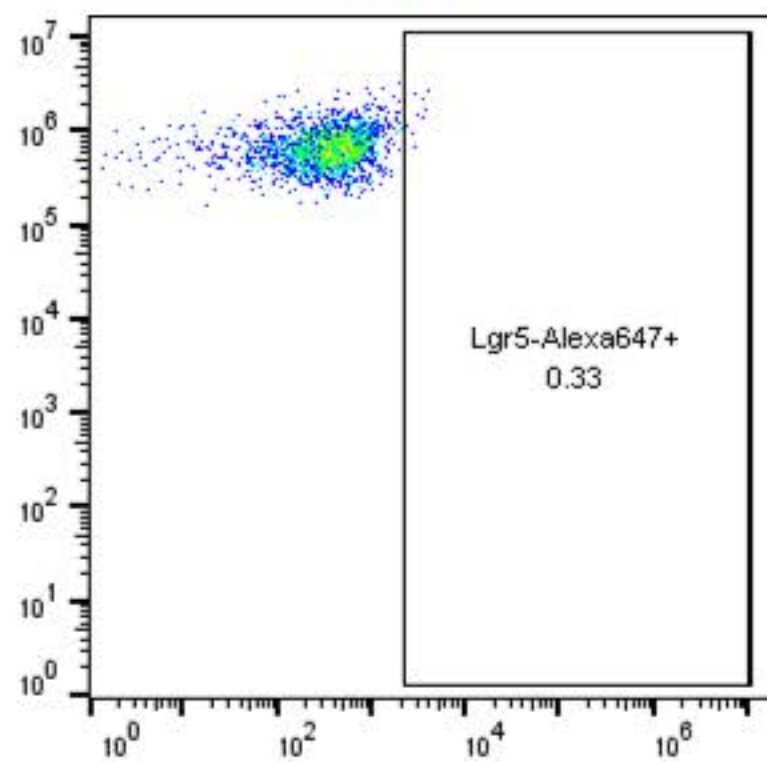

**B** DDK-Empty  
Alexa fluor 647 Rat IgG2b,  $\kappa$  Isotype  
(Control)

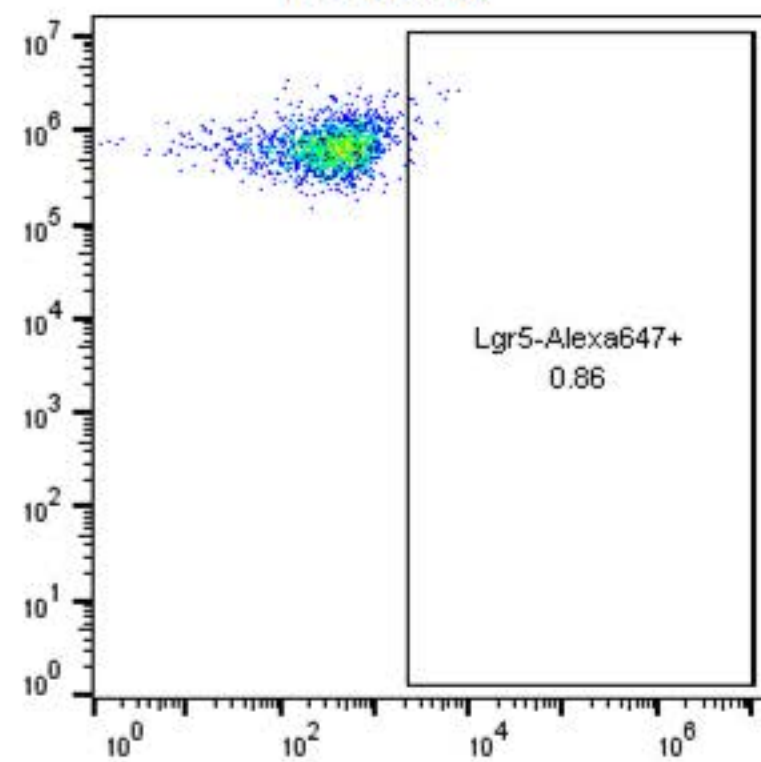

**C** DDK-Empty  
Alexa Fluor 647  
Rat Anti-Human Lgr5

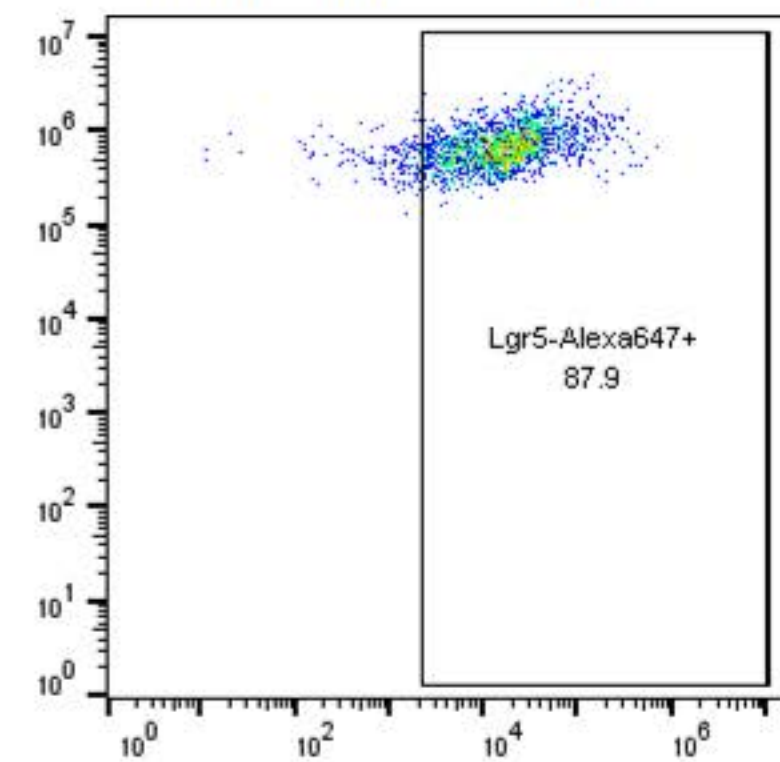

**D** DDK-UBXN2A-unstained  
(Control)

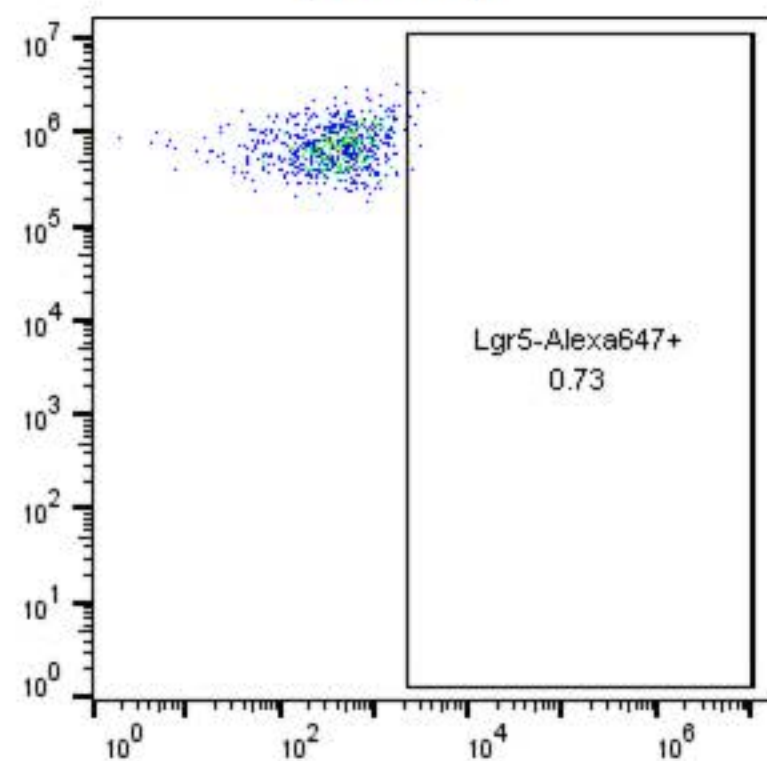

**E** DDK-UBXN2A  
Alexa fluor 647 Rat IgG2b,  $\kappa$  Isotype  
(Control)

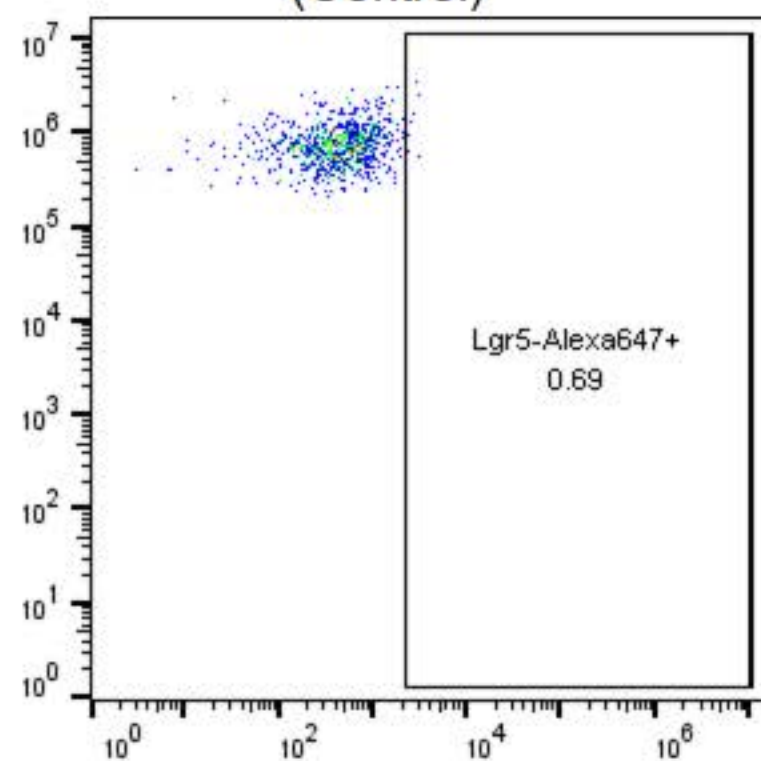

**F** DDK-UBXN2A  
Alexa Fluor 647  
Rat Anti-Human Lgr5

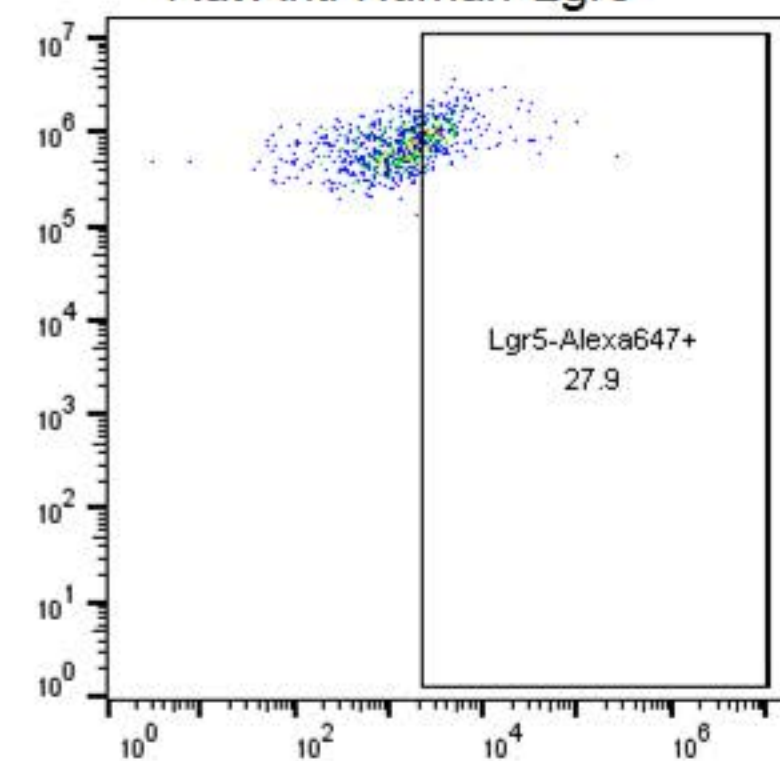

SSC-A :: SSC-A

Como-FL4-A::LGR5-Alexa476-A

**A**DDK-Empty-unstained  
(Control)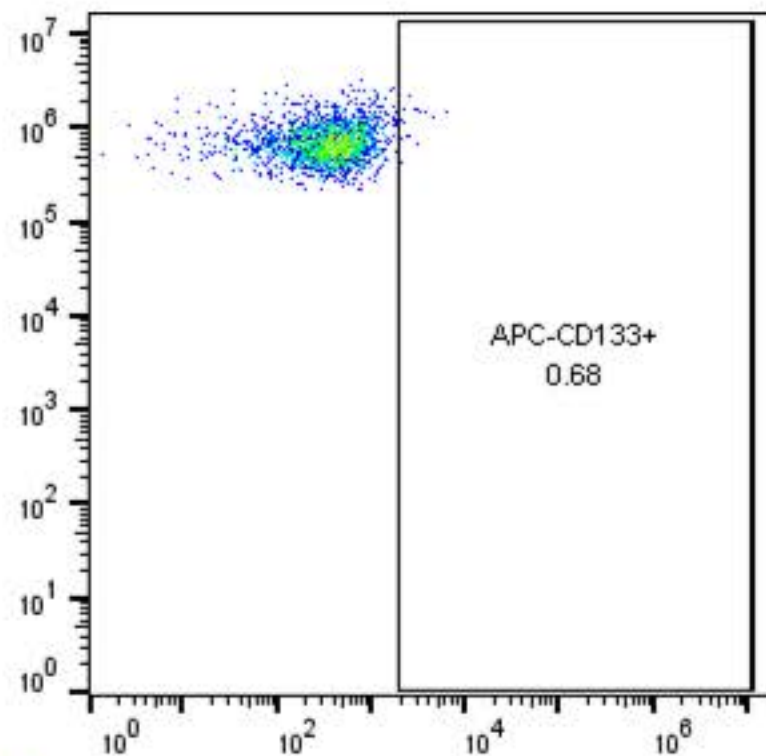**B**DDK-Empty  
APC Mouse IgG1  $\kappa$  Isotype (Control)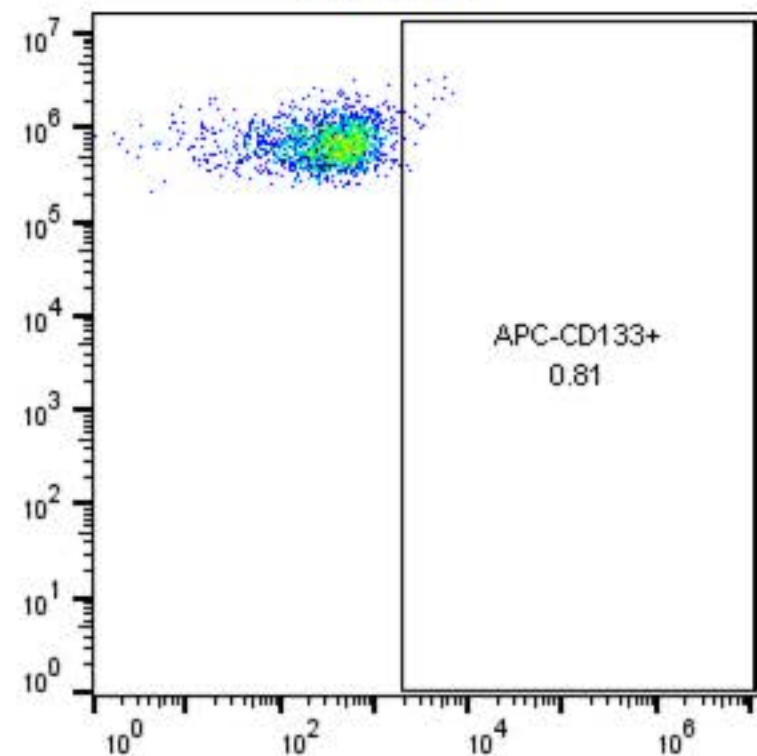**C**DDK-Empty  
APC Mouse Anti-Human CD133  
Clone W6B3C1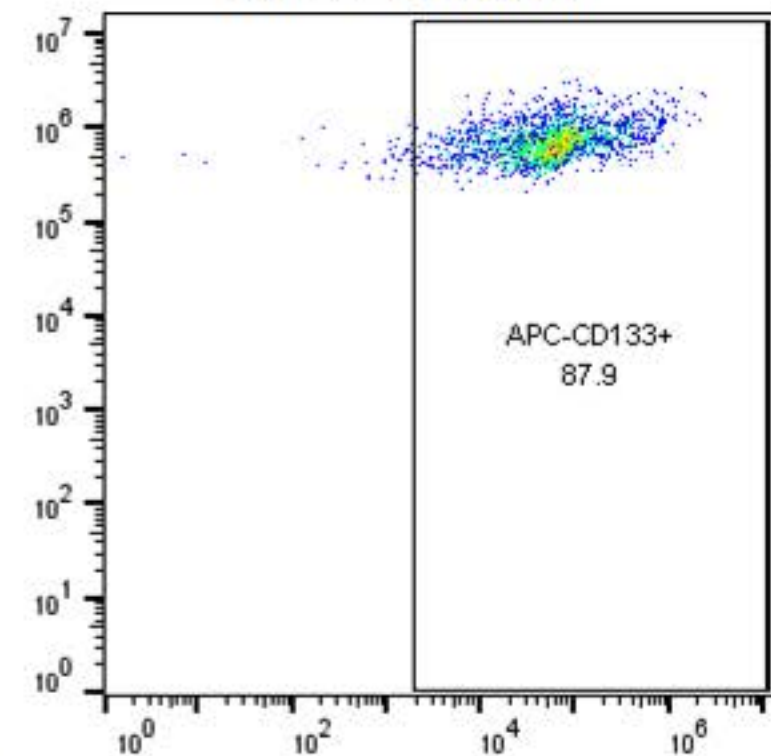**D**DDK-UBXN2A-unstained  
(Control)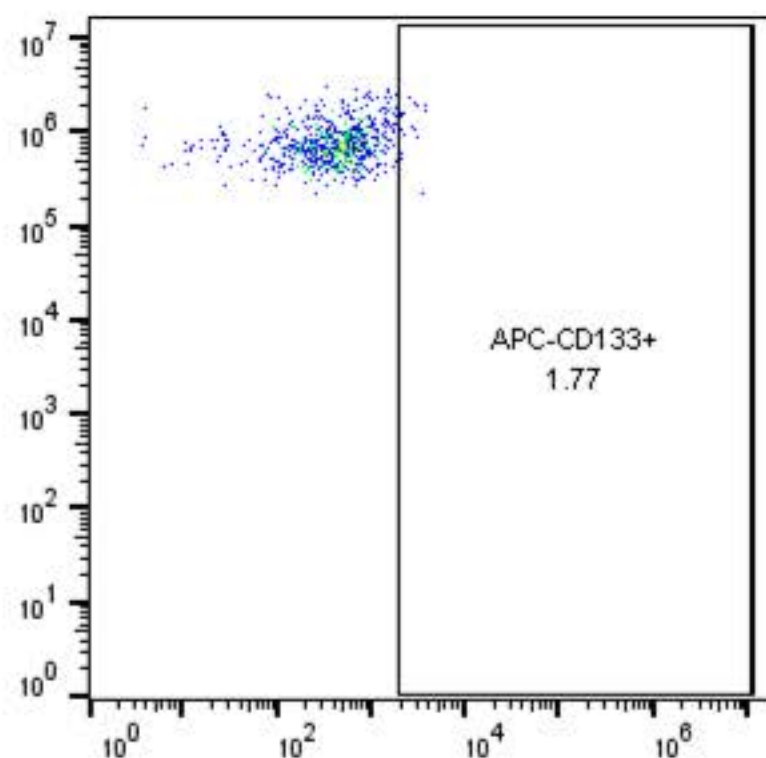**E**DDK-UBXN2A  
APC Mouse IgG1  $\kappa$  Isotype  
(Control)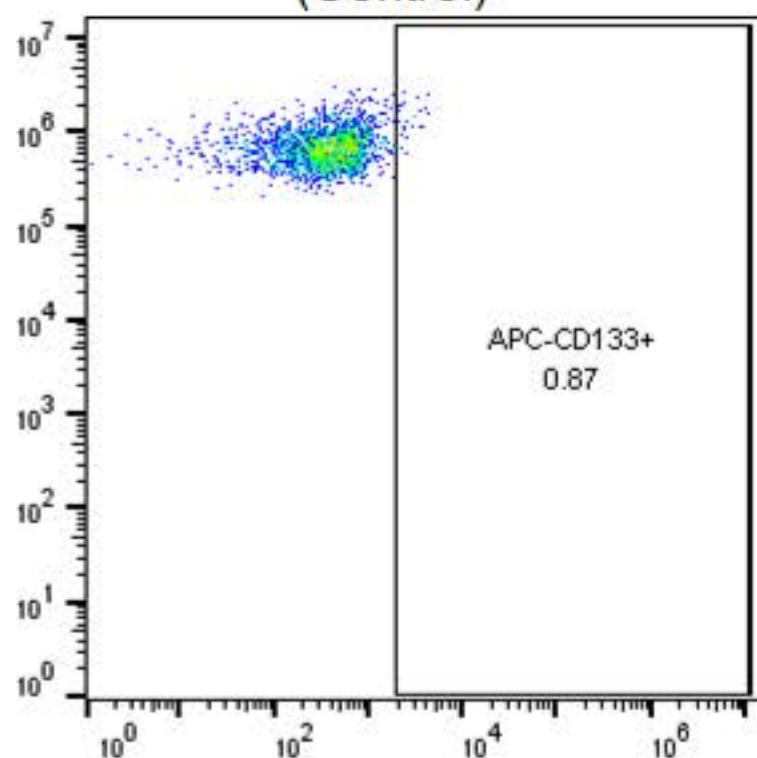**F**DDK-UBXN2A  
APC Mouse Anti-Human CD133  
Clone W6B3C1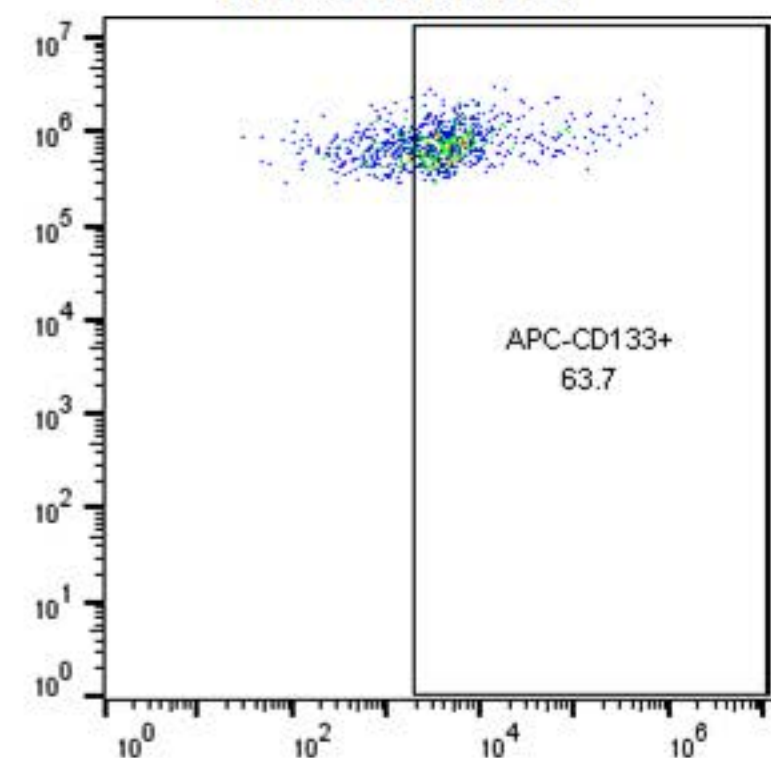

SSC-A :: SSC-A

FL4-A :: CD133-APC-A

# 5-FU-resistant HCT-116 colon cancer cell line

**A**

GFP-Empty-No Dox  
Gate: P1 in all

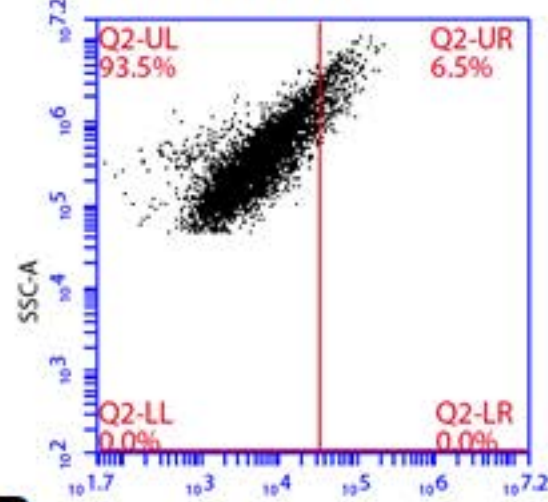

GFP-Empty-Plus Dox  
Gate: P1 in all

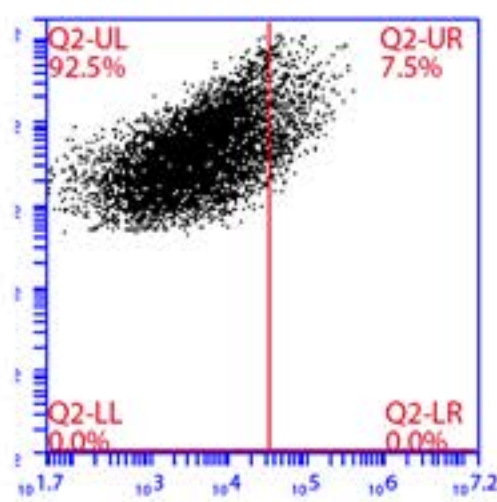

**B**

GFP-UBXN2A-No Dox  
Gate: P1 in all

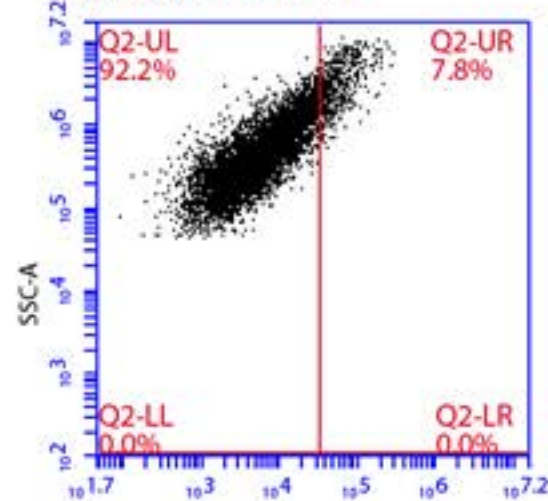

GFP-UBXN2A-Plus Dox  
Gate: P1 in all

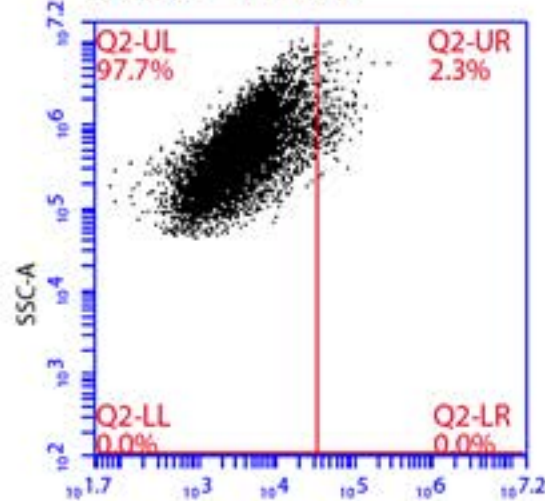

Phospho-Akt (ser 473)  
Alexa Fluor 647 conjugate

**C**

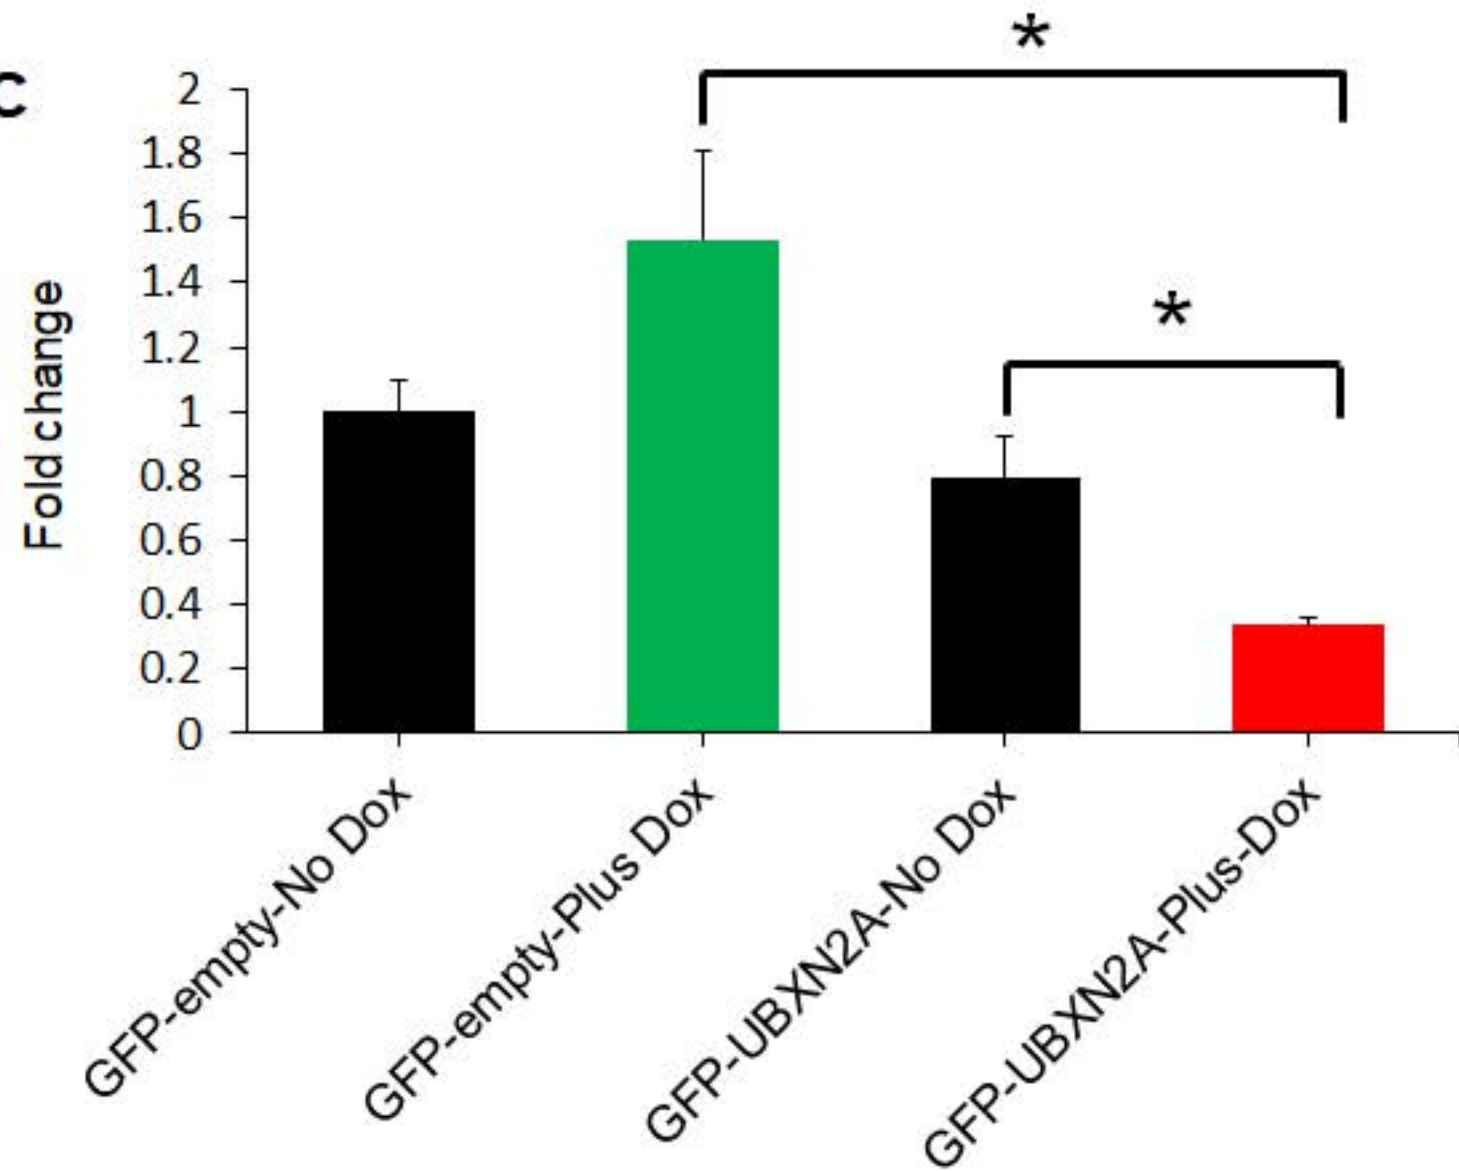

**A**

Cells-unstained

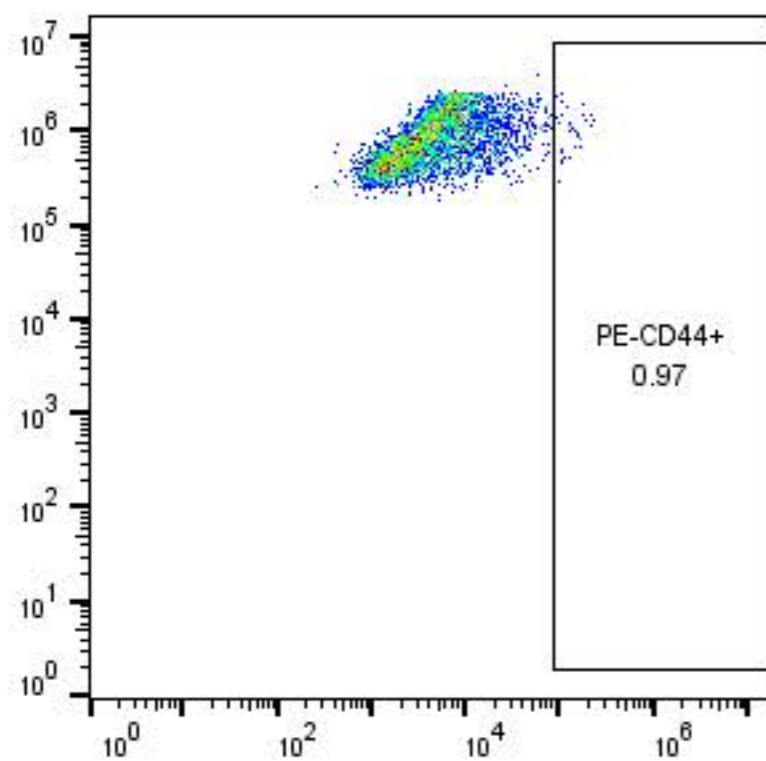

GFP-Empty

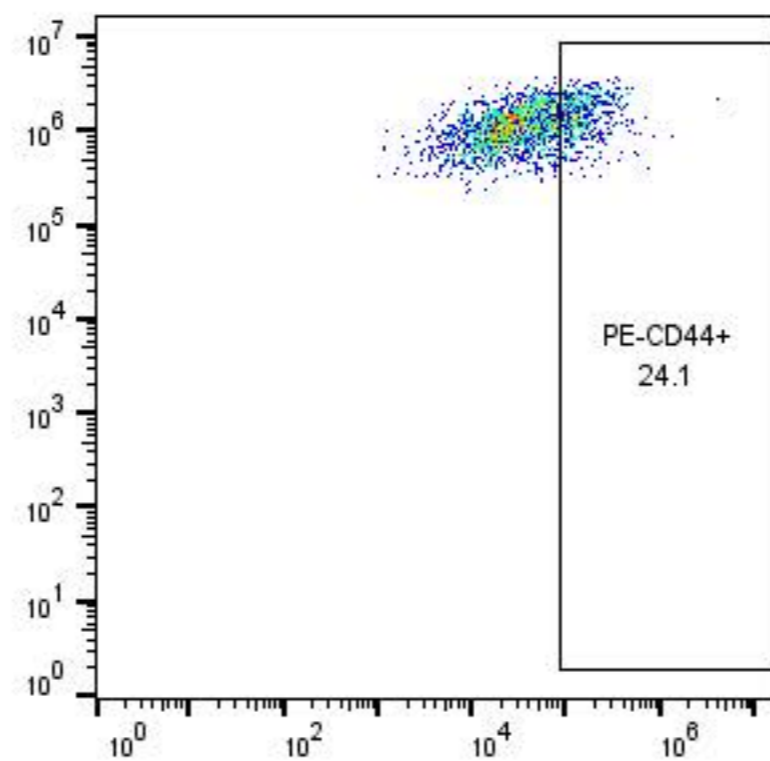

GFP-UBXN2A

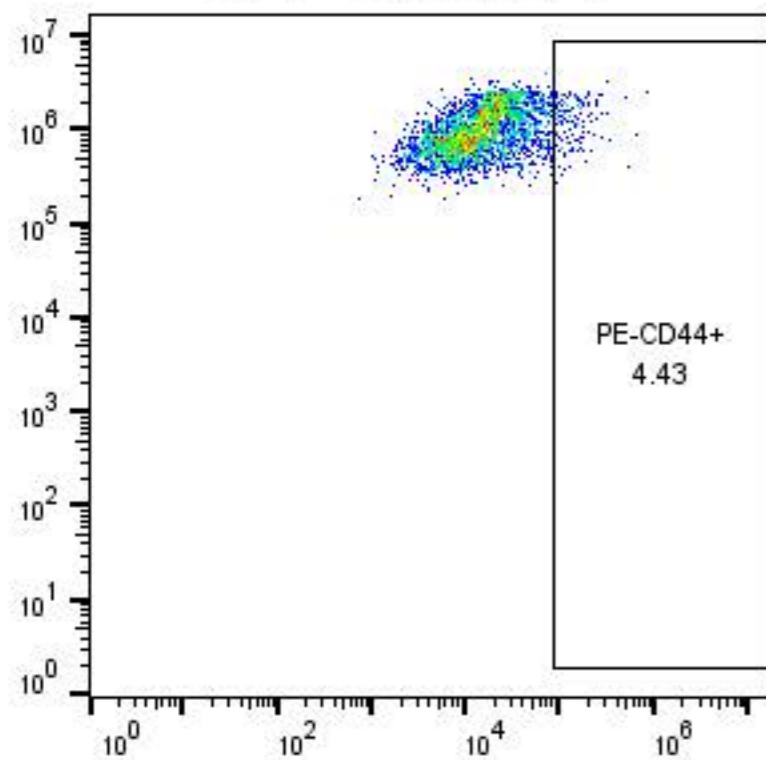

MYC-Rictor

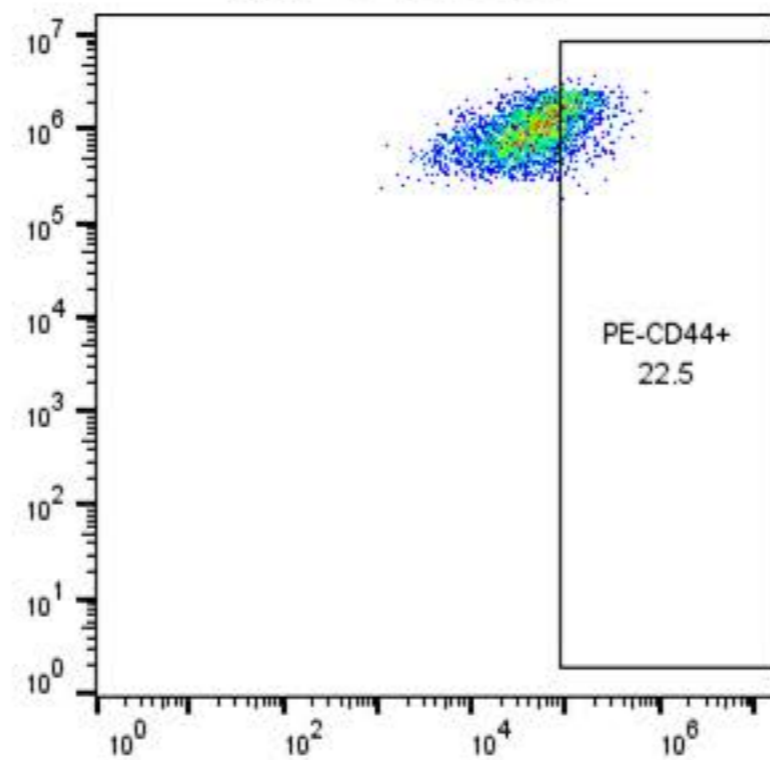

Como-FL2-A::PE-CD44-A

**B**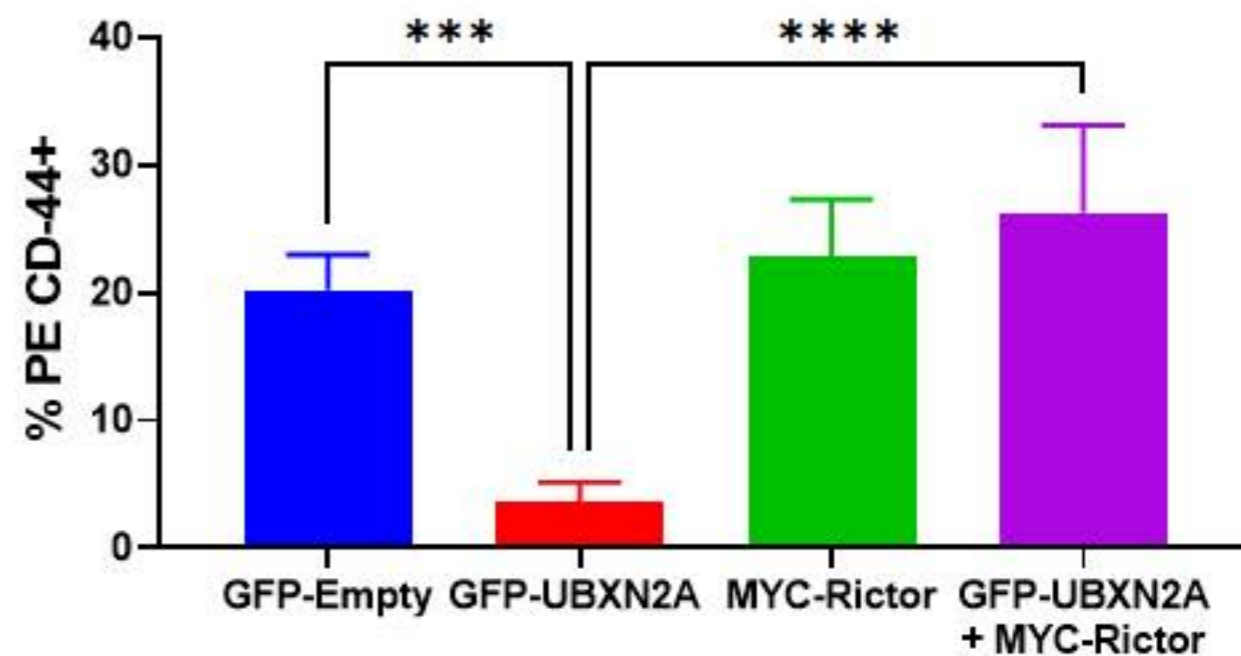**C**GFP-Empty  
+ MYC-Rictor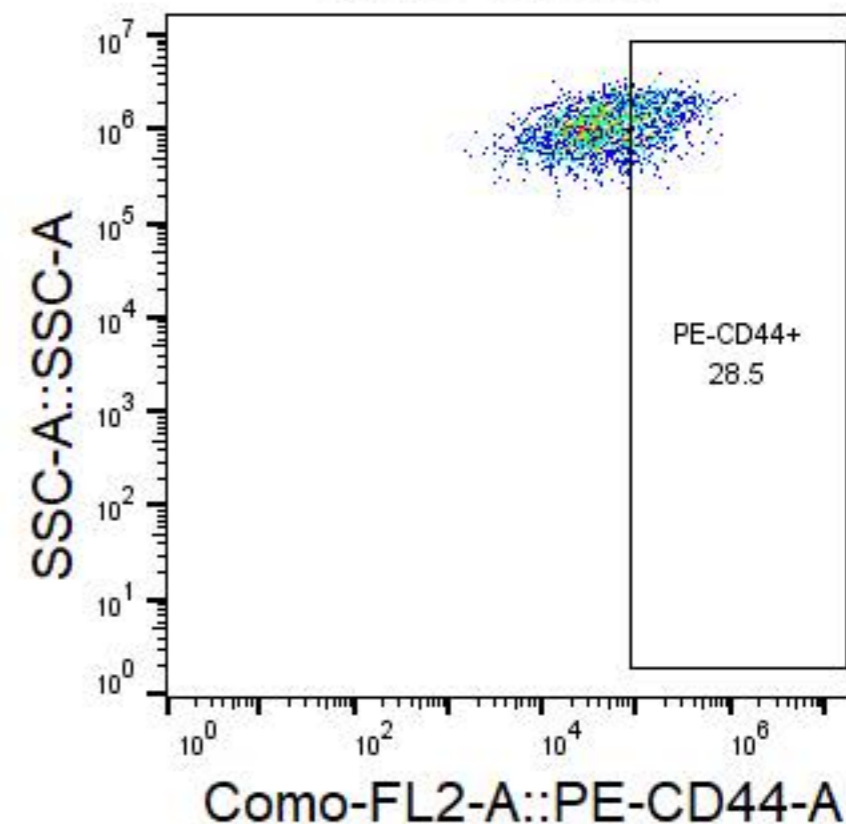

Supplement: NIHMS1909720-supplement-Supplement_Methods.pdf [file NIHMS1909720-supplement-Supplement_Methods.pdf]
